# Supplementary material for: Conformational landscape of β-cyclodextrin: A computational resource for host-guest modeling in supramolecular systems
Source: Research Square preprint supplement (doi:10.21203/rs.3.rs-7258991/v1), 2025-08-18
Supplement: Supplementary file 1 [file ea11b2c417bf76d0698f7d01.docx]

Table S. List of studied conformations of β-cyclodextrin (β-CD) divided into clusters based on the results of G value calculations in vacuo and using PCM solvation model.

| No | Conformation | Cluster (PCM) | Cluster (*in_vacuo*) | REFCODE with chemical name |
| --- | --- | --- | --- | --- |
| 1 | AGAZIR_CD1 | Cluster_13 | Cluster_15 | AGAZIR : β-Cyclodextrin N-acetyl-L-phenylalanine clathrate dodecahydrate |
| 2 | AGAZIR_CD2 | Cluster_16 | Cluster_16 | AGAZIR : β-Cyclodextrin N-acetyl-L-phenylalanine clathrate dodecahydrate |
| 3 | AGAZOX_CD1 | Cluster_13 | Cluster_12 | AGAZOX : β-Cyclodextrin N-acetyl-L-phenylalanine clathrate dodecahydrate |
| 4 | AGAZOX_CD2 | Cluster_15 | Cluster_14 | AGAZOX : β-Cyclodextrin N-acetyl-L-phenylalanine clathrate dodecahydrate |
| 5 | AGAZUD_CD1 | Cluster_13 | Cluster_13 | AGAZUD : β-Cyclodextrin N-acetyl-D-phenylalanine clathrate hydrate |
| 6 | AGAZUD_CD2 | Cluster_15 | Cluster_14 | AGAZUD : β-Cyclodextrin N-acetyl-D-phenylalanine clathrate hydrate |
| 7 | AJUVAC_CD1 | Cluster_14 | Cluster_15 | AJUVAC : β-Cyclodextrin methyl 4-hydroxybenzoate clathrate tetradecahydrate |
| 8 | AJUVAC_CD2 | Cluster_16 | Cluster_17 | AJUVAC : β-Cyclodextrin methyl 4-hydroxybenzoate clathrate tetradecahydrate |
| 9 | AJUVEG_CD | Cluster_11 | Cluster_9 | AJUVEG : β-Cyclodextrin methyl 4-hydroxybenzoate clathrate hydrate |
| 10 | ANAXAP_CD | Cluster_13 | Cluster_17 | ANAXAP : Sodium bis(β-cyclodextrin) (μ2-2-(4-sulfonatophenyl)-2-azapropane-1,3-dithiolato)-hexacarbonyl-di-iron octacosahydrate |
| 11 | ARUXIU_CD | Cluster_15 | Cluster_10 | ARUXIU : β-Cyclodextrin formic acid hydrate clathrate |
| 12 | ARUXOA_CD | Cluster_15 | Cluster_11 | ARUXOA : β-Cyclodextrin acetic acid hydrate clathrate |
| 13 | ASEVUQ_CD1 | Cluster_15 | Cluster_13 | ASEVUQ : bis(β-Cyclodextrin) tetra-potassium bis(4,4'-phenylenedicarboxylate) clathrate pentacosahydrate |
| 14 | ASEVUQ_CD2 | Cluster_9 | Cluster_6 | ASEVUQ : bis(β-Cyclodextrin) tetra-potassium bis(4,4'-phenylenedicarboxylate) clathrate pentacosahydrate |
| 15 | ASEWAX_CD1 | Cluster_11 | Cluster_12 | ASEWAX : tetrakis(β-Cyclodextrin) hexa-potassium tris(4,4'-phenylenedicarboxylate) clathrate tetrapentacontahydrate |
| 16 | ASEWAX_CD2 | Cluster_6 | Cluster_16 | ASEWAX : tetrakis(β-Cyclodextrin) hexa-potassium tris(4,4'-phenylenedicarboxylate) clathrate tetrapentacontahydrate |
| 17 | AVUDUS_CD | Cluster_11 | Cluster_9 | AVUDUS : β-cyclodextrin ethyl 4-aminobenzoate clathrate hydrate |
| 18 | AWITUY_CD | Cluster_6 | Cluster_12 | AWITUY : β-cyclodextrin protocatechuic acid hexahydrate |
| 19 | AWIVAG_CD | Cluster_6 | Cluster_8 | AWIVAG : β-cyclodextrin protocatechuic aldehyde hexahydrate |
| 20 | BARDAD_CD1 | Cluster_10 | Cluster_6 | BARDAD : sertraline hydrochloride β-cyclodextrin nonahydrate |
| 21 | BARDAD_CD2 | Cluster_10 | Cluster_9 | BARDAD : sertraline hydrochloride β-cyclodextrin nonahydrate |
| 22 | BARDEH_CD1 | Cluster_11 | Cluster_10 | BARDEH : fluoxetine hydrochloride β-cyclodextrin unknown solvate |
| 23 | BARDEH_CD2 | Cluster_10 | Cluster_13 | BARDEH : fluoxetine hydrochloride β-cyclodextrin unknown solvate |
| 24 | BCDEXD03_CD | Cluster_16 | Cluster_18 | BCDEXD03 : β-Cyclodextrin hydrate clathrate |
| 25 | BCDEXD04_CD | Cluster_15 | Cluster_18 | BCDEXD04 : β-Cyclodextrin hydrate clathrate |
| 26 | BCDEXD05_CD | Cluster_15 | Cluster_16 | BCDEXD05 : β-Cyclodextrin hydrate clathrate |
| 27 | BCDEXD10_CD | Cluster_15 | Cluster_16 | BCDEXD10 : β-Cyclodextrin dodecahydrate clathrate |
| 28 | BEDZOZ_CD | Cluster_12 | Cluster_15 | BEDZOZ : Aqua-(3-(glyoximato-O)propyl)-glyoximato-cobalt(iii) β-cyclodextrin hydrate clathrate |
| 29 | BEGWEQ_CD1 | Cluster_11 | Cluster_10 | BEGWEQ : bis(β-Cyclodextrin) paroxetine clathrate hydrate |
| 30 | BEGWEQ_CD2 | Cluster_7 | Cluster_10 | BEGWEQ : bis(β-Cyclodextrin) paroxetine clathrate hydrate |
| 31 | BEZCOA_CD1 | Cluster_12 | Cluster_10 | BEZCOA : β-Cyclodextrin 2-naphthylacetic acid clathrate hydrate |
| 32 | BEZCOA_CD2 | Cluster_9 | Cluster_4 | BEZCOA : β-Cyclodextrin 2-naphthylacetic acid clathrate hydrate |
| 33 | BEZLAT_CD | Cluster_12 | Cluster_12 | BEZLAT : (2)-(Poly(tris(ethylene glycol)))-(β-D-cyclodextrin)-polyrotaxane octahydrate |
| 34 | BICNIK_CD | Cluster_8 | Cluster_5 | BICNIK : β-D-Cyclodextrin aqua-(2-methoxycarbonylethyl)cobaloxime clathrate nonahydrate |
| 35 | BIDMOQ_CD1 | Cluster_12 | Cluster_12 | BIDMOQ : bis(β-Cyclodextrin) ethyl cinnamate hydrate |
| 36 | BIDMOQ_CD2 | Cluster_17 | Cluster_18 | BIDMOQ : bis(β-Cyclodextrin) ethyl cinnamate hydrate |
| 37 | BIHJEH_CD | Cluster_10 | Cluster_3 | BIHJEH : β-cyclodextrin ethyl p-amino-benzoate hydrate |
| 38 | BIQTED_CD | Cluster_7 | Cluster_9 | BIQTED : [2]-(coffee chloro­genic acid)-(β-cyclodextrin)-pseudorotaxane hydrate |
| 39 | BISTAY_CD | Cluster_4 | Cluster_9 | BISTAY : β-Cyclodextrin 1,4-diazabicyclo(2.2.2)octane clathrate tridecahydrate |
| 40 | BOBPEN_CD | Cluster_16 | Cluster_13 | BOBPEN : β-Cyclodextrin bis(hydrogen iodide) octahydrate |
| 41 | BOBPIR_CD | Cluster_17 | Cluster_18 | BOBPIR : β-Cyclodextrin methanol hydrate |
| 42 | BOGCAB_CD1 | Cluster_15 | Cluster_9 | BOGCAB : β-cyclodextrin 1-adamantane-carboxylic acid pentadecahydrate |
| 43 | BOGCAB_CD2 | Cluster_15 | Cluster_16 | BOGCAB : β-cyclodextrin 1-adamantane-carboxylic acid pentadecahydrate |
| 44 | BOSZEP_CD1 | Cluster_5 | Cluster_10 | BOSZEP : bis(β-Cyclodextrin) hemikis(4,4'-vinylenedipyridine) clathrate ethanol solvate hydrate |
| 45 | BOSZEP_CD2 | Cluster_9 | Cluster_10 | BOSZEP : bis(β-Cyclodextrin) hemikis(4,4'-vinylenedipyridine) clathrate ethanol solvate hydrate |
| 46 | BOSZIT_CD1 | Cluster_5 | Cluster_10 | BOSZIT : β-Cyclodextrin 4,4'-ethylenedipyridine clathrate ethanol solvate hydrate |
| 47 | BOSZIT_CD2 | Cluster_10 | Cluster_10 | BOSZIT : β-Cyclodextrin 4,4'-ethylenedipyridine clathrate ethanol solvate hydrate |
| 48 | BOSZOZ_CD1 | Cluster_5 | Cluster_10 | BOSZOZ : β-Cyclodextrin 4,4'-dithiodipyridine clathrate decahydrate |
| 49 | BOSZOZ_CD2 | Cluster_10 | Cluster_8 | BOSZOZ : β-Cyclodextrin 4,4'-dithiodipyridine clathrate decahydrate |
| 50 | BOSZUF_CD | Cluster_10 | Cluster_10 | BOSZUF : β-Cyclodextrin 2,2'-dithiodipyridine clathrate hydrate |
| 51 | BOTBAO_CD | Cluster_11 | Cluster_13 | BOTBAO : β-Cyclodextrin 1-(2-pyridyl)-2-(4-pyridyl)ethylene clathrate hydrate |
| 52 | BOTBES_CD1 | Cluster_10 | Cluster_10 | BOTBES : β-Cyclodextrin 2,2'-vinylenedipyridine clathrate methanol solvate hydrate |
| 53 | BOTBES_CD2 | Cluster_15 | Cluster_12 | BOTBES : β-Cyclodextrin 2,2'-vinylenedipyridine clathrate methanol solvate hydrate |
| 54 | BURXOC_CD1 | Cluster_14 | Cluster_12 | BURXOC : bis(β-Cyclodextrin) glimepiride clathrate ethanol solvate hydrate |
| 55 | BURXOC_CD2 | Cluster_17 | Cluster_16 | BURXOC : bis(β-Cyclodextrin) glimepiride clathrate ethanol solvate hydrate |
| 56 | BURXUI_CD | Cluster_11 | Cluster_9 | BURXUI : β-Cyclodextrin hemikis(tolbutamide) clathrate hydrate |
| 57 | BURYAP_CD | Cluster_13 | Cluster_11 | BURYAP :β-Cyclodextrin tolazamide clathrate hydrate |
| 58 | BUVSEQ01_CD | Cluster_17 | Cluster_16 | BUVSEQ01 : β-Cyclodextrin hydrate clathrate |
| 59 | BUXKIR_CD | Cluster_8 | Cluster_15 | BUXKIR : β-cyclodextrin clomipramine chloride hydrate |
| 60 | BUXKOX_CD | Cluster_8 | Cluster_12 | BUXKOX : β-cyclodextrin doxepin chloride ethanol solvate hydrate |
| 61 | CACQED_CD | Cluster_12 | Cluster_8 | CACQED : β-Cyclodextrin 2,7-dihydroxynaphthalene hydrate clathrate |
| 62 | CAWDUD_CD1 | Cluster_16 | Cluster_12 | CAWDUD : tri-sodium hexakis(μ-oxido)-hexakis(μ-hydroxido)-dodecaoxo-aluminium(iii)-hexa-molybdenum(vi) β-cyclodextrin unknown solvate hydrate |
| 63 | CAWDUD_CD2 | Cluster_12 | Cluster_16 | CAWDUD : tri-sodium hexakis(μ-oxido)-hexakis(μ-hydroxido)-dodecaoxo-aluminium(iii)-hexa-molybdenum(vi) β-cyclodextrin unknown solvate hydrate |
| 64 | CDETAN_CD1 | Cluster_15 | Cluster_12 | CDETAN : β-Cyclodextrin p-ethylaniline clathrate hexadecahydrate |
| 65 | CDETAN_CD2 | Cluster_15 | Cluster_9 | CDETAN : β-Cyclodextrin p-ethylaniline clathrate hexadecahydrate |
| 66 | CECVOY_CD1 | Cluster_5 | Cluster_16 | CECVOY : β-cyclodextrin N,N-dimethylacrylamide hydrate |
| 67 | CECVOY_CD2 | Cluster_9 | Cluster_8 | CECVOY : β-cyclodextrin N,N-dimethylacrylamide hydrate |
| 68 | CEQTUO_CD | Cluster_8 | Cluster_6 | CEQTUO : β-Cyclodextrin aqua-(dimethylglyoximato)-(O-tetramethylene-dimethylglyoximato)-cobalt clathrate tetrahydrate |
| 69 | CILWUR_CD | Cluster_8 | Cluster_8 | CILWUR : β-Cyclodextrin hemikis(3-nitrophenoxyacetic acid) hydrate |
| 70 | CIQFIU_CD | Cluster_6 | Cluster_13 | CIQFIU : β-cyclodextrin tyrosol clathrate pentahydrate |
| 71 | CIQFOA_CD | Cluster_9 | Cluster_9 | CIQFOA : β-cyclodextrin hydroxytyrosol clathrate hexahydrate |
| 72 | COCMIQ_CD | Cluster_12 | Cluster_11 | COCMIQ : bis(β-Cyclodextrin) potassium hepta-iodide nonahydrate |
| 73 | CUPYOC_CD1 | Cluster_11 | Cluster_8 | CUPYOC : bis(β-Cyclodextrin) N-methylanthranilic acid isopropanol clathrate isopropanol solvate hydrate |
| 74 | CUPYOC_CD2 | Cluster_10 | Cluster_8 | CUPYOC : bis(β-Cyclodextrin) N-methylanthranilic acid isopropanol clathrate isopropanol solvate hydrate |
| 75 | DAWMIZ_CD | Cluster_8 | Cluster_13 | DAWMIZ : β-Cyclodextrin piperazine dodecahydrate |
| 76 | DEBGOG_CD | Cluster_7 | Cluster_8 | DEBGOG : β-Cyclodextrin benzyl alcohol clathrate pentahydrate |
| 77 | DEWCOY_CD | Cluster_7 | Cluster_6 | DEWCOY : β-Cyclodextrin benzamide clathrate hexahydrate |
| 78 | DEWMEA_CD1 | Cluster_16 | Cluster_16 | DEWMEA : β-cyclodextrin β-citronellol hydrate |
| 79 | DEWMEA_CD2 | Cluster_8 | Cluster_4 | DEWMEA : β-cyclodextrin β-citronellol hydrate |
| 80 | DICZOF_CD | Cluster_8 | Cluster_4 | DICZOF : β-Cyclodextrin aqua-(4-(4-t-butylbenzyl)diethylenetriamine)-copper(ii) clathrate diperchlorate methanol solvate hydrate |
| 81 | DIFHOP_CD1 | Cluster_15 | Cluster_15 | DIFHOP : bis(β-Cyclodextrin acetylsalicylic acid) salicylic acid clathrate hydrate |
| 82 | DIFHOP_CD2 | Cluster_13 | Cluster_10 | DIFHOP : bis(β-Cyclodextrin acetylsalicylic acid) salicylic acid clathrate hydrate |
| 83 | DIRVOP_CD | Cluster_10 | Cluster_17 | DIRVOP : β-Cyclodextrin hexamethylenetetramine clathrate hexahydrate |
| 84 | DOCVUM04_CD1 | Cluster_13 | Cluster_12 | DOCVUM04 : bis(β-Cyclodextrin) bis(N-acetyl-L-phenylalanine methyl ester) clathrate hydrate |
| 85 | DOCVUM04_CD2 | Cluster_16 | Cluster_16 | DOCVUM04 : bis(β-Cyclodextrin) bis(N-acetyl-L-phenylalanine methyl ester) clathrate hydrate |
| 86 | DOCVUM06_CD1 | Cluster_12 | Cluster_13 | DOCVUM06 : bis(β-Cyclodextrin) bis(N-acetyl-L-phenylalanine methyl ester) clathrate hydrate |
| 87 | DOCVUM06_CD2 | Cluster_17 | Cluster_17 | DOCVUM06 : bis(β-Cyclodextrin) bis(N-acetyl-L-phenylalanine methyl ester) clathrate hydrate |
| 88 | DOCVUM07_CD1 | Cluster_12 | Cluster_11 | DOCVUM07 : bis(β-Cyclodextrin) bis(N-acetyl-L-phenylalanine methyl ester) clathrate hydrate |
| 89 | DOCVUM07_CD2 | Cluster_16 | Cluster_16 | DOCVUM07 : bis(β-Cyclodextrin) bis(N-acetyl-L-phenylalanine methyl ester) clathrate hydrate |
| 90 | DOCVUM08_CD1 | Cluster_12 | Cluster_13 | DOCVUM08 : bis(β-Cyclodextrin) bis(N-acetyl-L-phenylalanine methyl ester) clathrate hydrate |
| 91 | DOCVUM08_CD2 | Cluster_17 | Cluster_18 | DOCVUM08 : bis(β-Cyclodextrin) bis(N-acetyl-L-phenylalanine methyl ester) clathrate hydrate |
| 92 | DOCVUM09_CD1 | Cluster_13 | Cluster_12 | DOCVUM09 : bis(β-Cyclodextrin) bis(N-acetyl-L-phenylalanine methyl ester) clathrate hydrate |
| 93 | DOCVUM09_CD2 | Cluster_17 | Cluster_16 | DOCVUM09 : bis(β-Cyclodextrin) bis(N-acetyl-L-phenylalanine methyl ester) clathrate hydrate |
| 94 | DOCVUM10_CD1 | Cluster_13 | Cluster_9 | DOCVUM10 : bis(β-Cyclodextrin) bis(N-acetyl-L-phenylalanine methyl ester) clathrate hydrate |
| 95 | DOCVUM10_CD2 | Cluster_17 | Cluster_18 | DOCVUM10 : bis(β-Cyclodextrin) bis(N-acetyl-L-phenylalanine methyl ester) clathrate hydrate |
| 96 | DOCVUM11_CD1 | Cluster_12 | Cluster_11 | DOCVUM11 : bis(β-Cyclodextrin) bis(N-acetyl-L-phenylalanine methyl ester) clathrate hydrate |
| 97 | DOCVUM11_CD2 | Cluster_15 | Cluster_14 | DOCVUM11 : bis(β-Cyclodextrin) bis(N-acetyl-L-phenylalanine methyl ester) clathrate hydrate |
| 98 | DOQPOO_CD | Cluster_12 | Cluster_11 | DOQPOO : β-Cyclodextrin butyrophenone clathrate hydrate |
| 99 | DOQPUU_CD | Cluster_10 | Cluster_10 | DOQPUU : β-Cyclodextrin valerophenone clathrate undecahydrate |
| 100 | DUCMUL_CD | Cluster_11 | Cluster_15 | DUCMUL : β-cyclodextrin sesquikis((+)-borneol) hydrate |
| 101 | DUCNEW_CD | Cluster_17 | Cluster_14 | DUCNEW : β-cyclodextrin sesquikis((-)-borneol) hydrate |
| 102 | DUMQIO_CD | Cluster_8 | Cluster_12 | DUMQIO : β-cyclodextrin nortriptyline chloride hydrate |
| 103 | DUMQOU_CD | Cluster_8 | Cluster_12 | DUMQOU : β-cyclodextrin amitriptyline hydrogen chloride hydrate |
| 104 | DUTLIN10_CD1 | Cluster_12 | Cluster_11 | DUTLIN10 : β-Cyclodextrin (2-(3-phenoxyphenyl)propionic acid) clathrate hydrate |
| 105 | DUTLIN10_CD2 | Cluster_6 | Cluster_5 | DUTLIN10 : β-Cyclodextrin (2-(3-phenoxyphenyl)propionic acid) clathrate hydrate |
| 106 | DUYVID_CD | Cluster_6 | Cluster_13 | DUYVID : β-cyclodextrin sesquikis(adamantane) clathrate hydrate |
| 107 | EMIPIA_CD | Cluster_12 | Cluster_11 | EMIPIA : β-cyclodextrin thymol clathrate hydrate |
| 108 | EMIVOO_CD | Cluster_15 | Cluster_14 | EMIVOO : β-cyclodextrin citral hydrate |
| 109 | EQENEV_CD1 | Cluster_5 | Cluster_14 | EQENEV : β-cyclodextrin aegelinol clathrate hydrate |
| 110 | EQENEV_CD2 | Cluster_8 | Cluster_8 | EQENEV : β-cyclodextrin aegelinol clathrate hydrate |
| 111 | EWUYAW_CD | Cluster_6 | Cluster_11 | EWUYAW : (2)-(Poly(trimethylene oxide))-(β-cyclodextrin)-polyrotaxane tridecahydrate |
| 112 | EWUYEA_CD | Cluster_12 | Cluster_11 | EWUYEA : (2)-(Poly(propylene glycol))-(β-cyclodextrin)-polyrotaxane tridecahydrate |
| 113 | EYAQAX_CD1 | Cluster_14 | Cluster_13 | EYAQAX : β-Cyclodextrin 7-hydroxycoumarin clathrate hydrate |
| 114 | EYAQAX_CD2 | Cluster_15 | Cluster_13 | EYAQAX : β-Cyclodextrin 7-hydroxycoumarin clathrate hydrate |
| 115 | EYAQEB_CD1 | Cluster_14 | Cluster_15 | EYAQEB : β-Cyclodextrin sesquikis(4-hydroxycoumarin) clathrate hydrate |
| 116 | EYAQEB_CD2 | Cluster_15 | Cluster_18 | EYAQEB : β-Cyclodextrin sesquikis(4-hydroxycoumarin) clathrate hydrate |
| 117 | EZEYAJ_CD1 | Cluster_10 | Cluster_3 | EZEYAJ : β-D-Cyclodextrin 2,2'-bipyridine clathrate nonahydrate |
| 118 | EZEYAJ_CD2 | Cluster_14 | Cluster_11 | EZEYAJ : β-D-Cyclodextrin 2,2'-bipyridine clathrate nonahydrate |
| 119 | FACGAU_CD | Cluster_12 | Cluster_7 | FACGAU : β-cyclodextrin propionic acid tridecahydrate |
| 120 | FADFIC_CD1 | Cluster_12 | Cluster_12 | FADFIC : 1,3-bis(2-(adamantan-1-yl)ethyl)imidazolium bis(trifluorometylsulfonyl)imide β-cyclodextrins tetratetracontahydrate |
| 121 | FADFIC_CD2 | Cluster_16 | Cluster_15 | FADFIC : 1,3-bis(2-(adamantan-1-yl)ethyl)imidazolium bis(trifluorometylsulfonyl)imide β-cyclodextrins tetratetracontahydrate |
| 122 | FALDUS_CD | Cluster_5 | Cluster_8 | FALDUS : β-Cyclodextrin 2-methylpentane-2,4-diol solvate nonahydrate |
| 123 | FASXUS_CD | Cluster_7 | Cluster_6 | FASXUS : β-Cyclodextrin 1-hydroxymethyl-adamantane undecahydrate |
| 124 | FEXBOA_CD | Cluster_8 | Cluster_8 | FEXBOA : β-Cyclodextrin (4-chlorophenoxy)acetic acid clathrate hydrate |
| 125 | FODBEG_CD1 | Cluster_11 | Cluster_9 | FODBEG : β-Cyclodextrin 4-hydroxyazobenzene octahydrate clathrate |
| 126 | FODBEG_CD2 | Cluster_7 | Cluster_8 | FODBEG : β-Cyclodextrin 4-hydroxyazobenzene octahydrate clathrate |
| 127 | FODBIK_CD1 | Cluster_11 | Cluster_12 | FODBIK : β-Cyclodextrin 4-aminoazobenzene hydrate clathrate |
| 128 | FODBIK_CD2 | Cluster_13 | Cluster_9 | FODBIK : β-Cyclodextrin 4-aminoazobenzene hydrate clathrate |
| 129 | GAKPIU_CD | Cluster_7 | Cluster_10 | GAKPIU : β-Cyclodextrin pentahydrate |
| 130 | GAKPOA_CD | Cluster_7 | Cluster_12 | GAKPOA : β-Cyclodextrin hydrate |
| 131 | GEKWIF_CD | Cluster_9 | Cluster_12 | GEKWIF : β-cyclodextrin hydrate |
| 132 | GEKWOL_CD1 | Cluster_14 | Cluster_12 | GEKWOL : β-cyclodextrin L-N-acetyltryptophan hydrate |
| 133 | GEKWOL_CD2 | Cluster_15 | Cluster_15 | GEKWOL : β-cyclodextrin L-N-acetyltryptophan hydrate |
| 134 | GETPAW_CD1 | Cluster_11 | Cluster_13 | GETPAW : β-Cyclodextrin (R)-(-)-fenoprofen clathrate hydrate |
| 135 | GETPAW_CD2 | Cluster_6 | Cluster_8 | GETPAW : β-Cyclodextrin (R)-(-)-fenoprofen clathrate hydrate |
| 136 | GETPEA_CD1 | Cluster_12 | Cluster_11 | GETPEA : β-Cyclodextrin (S)-(+)-fenoprofen clathrate hydrate |
| 137 | GETPEA_CD2 | Cluster_10 | Cluster_12 | GETPEA : β-Cyclodextrin (S)-(+)-fenoprofen clathrate hydrate |
| 138 | GIPFEQ_CD | Cluster_11 | Cluster_15 | GIPFEQ : trans-Ammine-dichloro-trimethylphosphine-platinum β-cyclodextrin clathrate hydrate |
| 139 | GOSQOU_CD | Cluster_11 | Cluster_11 | GOSQOU : β-Cyclodextrin sesquikis(coumarin) clathrate dodecahydrate |
| 140 | GOTMOT_CD1 | Cluster_5 | Cluster_10 | GOTMOT : 4-Phenyl-pyridine-N-oxide β-cyclodextrin undecahydrate |
| 141 | GOTMOT_CD2 | Cluster_9 | Cluster_8 | GOTMOT : 4-Phenyl-pyridine-N-oxide β-cyclodextrin undecahydrate |
| 142 | GOTMUZ_CD | Cluster_15 | Cluster_15 | GOTMUZ : 4-Phenylpyridine-N-oxide β-cyclodextrin nonahydrate |
| 143 | GUMXIX_CD1 | Cluster_4 | Cluster_13 | GUMXIX : N-(4-methyl-2-oxo-2H-chromen-7-yl)methioninamide β-cyclodextrin unknown solvate octahydrate |
| 144 | GUMXIX_CD2 | Cluster_9 | Cluster_16 | GUMXIX : N-(4-methyl-2-oxo-2H-chromen-7-yl)methioninamide β-cyclodextrin unknown solvate octahydrate |
| 145 | GUXZOO_CD | Cluster_9 | Cluster_6 | GUXZOO : β-Cyclodextrin m-aminophenol clathrate methanol solvate hydrate |
| 146 | HAKPUG_CD1 | Cluster_13 | Cluster_9 | HAKPUG : β-Cyclodextrin biphenyl-4-ylacetic acid undecahydrate |
| 147 | HAKPUG_CD2 | Cluster_17 | Cluster_16 | HAKPUG : β-Cyclodextrin biphenyl-4-ylacetic acid undecahydrate |
| 148 | HAMBZB_CD | Cluster_4 | Cluster_8 | HAMBZB : β-cyclodextrin 2-bromo-5-t-butylphenol nonahydrate |
| 149 | HANGEK_CD | Cluster_11 | Cluster_7 | HANGEK : β-cyclodextrin 2,6-bis(2-(2-(2-methoxyethoxy)ethoxy)ethoxy)naphthalene hydrate |
| 150 | HAPJOB_CD | Cluster_17 | Cluster_15 | HAPJOB : β-cyclodextrin paroxetine hydrogen chloride ethoh solvate heptahydrate |
| 151 | HAQNUK_CD | Cluster_12 | Cluster_13 | HAQNUK : β-Cyclodextrin 1,4-dioxane solvate heptahydrate |
| 152 | HAXJIB_CD | Cluster_3 | Cluster_2 | HAXJIB : β-Cyclodextrin lipoic acid clathrate nonahydrate |
| 153 | HEGXUM_CD1 | Cluster_12 | Cluster_12 | HEGXUM : β-Cyclodextrin 4-t-butylbenzoic acid clathrate hydrate |
| 154 | HEGXUM_CD2 | Cluster_17 | Cluster_18 | HEGXUM : β-Cyclodextrin 4-t-butylbenzoic acid clathrate hydrate |
| 155 | HEHJEJ_CD | Cluster_14 | Cluster_13 | HEHJEJ : β-Cyclodextrin sodium diclofenac undecahydrate clathrate |
| 156 | HIDZAV_CD | Cluster_12 | Cluster_18 | HIDZAV : β-Cyclodextrin bis(calcium dichloride) hydrate |
| 157 | HOGCOV_CD | Cluster_14 | Cluster_13 | HOGCOV : β-Cyclodextrin aqua-isobutyl-cobaloxime clathrate nonahydrate |
| 158 | HOXDOQ_CD1 | Cluster_12 | Cluster_13 | HOXDOQ : β-cyclodextrin potassium hydroxide methanol solvate hydrate |
| 159 | HOXDOQ_CD2 | Cluster_16 | Cluster_15 | HOXDOQ : β-cyclodextrin potassium hydroxide methanol solvate hydrate |
| 160 | HOXDOQ_CD3 | Cluster_8 | Cluster_4 | HOXDOQ : β-cyclodextrin potassium hydroxide methanol solvate hydrate |
| 161 | HOXDOQ_CD4 | Cluster_14 | Cluster_13 | HOXDOQ : β-cyclodextrin potassium hydroxide methanol solvate hydrate |
| 162 | HOXDUW_CD1 | Cluster_16 | Cluster_15 | HOXDUW : β-cyclodextrin potassium hydroxide chlosterol hydrate |
| 163 | HOXDUW_CD2 | Cluster_17 | Cluster_14 | HOXDUW : β-cyclodextrin potassium hydroxide chlosterol hydrate |
| 164 | HPAMIB10_CD | Cluster_12 | Cluster_10 | HPAMIB10 : β-cyclodextrin 2,5-di-iodobenzoic acid octahydrate |
| 165 | HULVAO_CD1 | Cluster_12 | Cluster_14 | HULVAO : sodium hydrogen β-cyclodextrin bis(μ-phosphato)-pentakis(μ-oxido)-decaoxo-penta-molybdenum hemi-acetate hydrate |
| 166 | HULVAO_CD2 | Cluster_15 | Cluster_13 | HULVAO : sodium hydrogen β-cyclodextrin bis(μ-phosphato)-pentakis(μ-oxido)-decaoxo-penta-molybdenum hemi-acetate hydrate |
| 167 | HULVAO_CD3 | Cluster_16 | Cluster_14 | HULVAO : sodium hydrogen β-cyclodextrin bis(μ-phosphato)-pentakis(μ-oxido)-decaoxo-penta-molybdenum hemi-acetate hydrate |
| 168 | HULVAO_CD4 | Cluster_15 | Cluster_13 | HULVAO : sodium hydrogen β-cyclodextrin bis(μ-phosphato)-pentakis(μ-oxido)-decaoxo-penta-molybdenum hemi-acetate hydrate |
| 169 | HUTKIQ_CD1 | Cluster_12 | Cluster_12 | HUTKIQ : bis(β-Cyclodextrin) diaqua-(benzoato)-hydroxy-dioxo-uranium(vi) clathrate hydrate |
| 170 | HUTKIQ_CD2 | Cluster_16 | Cluster_14 | HUTKIQ : bis(β-Cyclodextrin) diaqua-(benzoato)-hydroxy-dioxo-uranium(vi) clathrate hydrate |
| 171 | HUTKOW_CD | Cluster_6 | Cluster_5 | HUTKOW : β-Cyclodextrin diaqua-(benzoato)-hydroxy-dioxo-uranium(vi) clathrate hydrate |
| 172 | ICIYAW_CD1 | Cluster_8 | Cluster_9 | ICIYAW : bis(β-cyclodextrin) trimethyl(ferrocenylmethyl)ammonium iodide unknown solvate |
| 173 | ICIYAW_CD2 | Cluster_11 | Cluster_6 | ICIYAW : bis(β-cyclodextrin) trimethyl(ferrocenylmethyl)ammonium iodide unknown solvate |
| 174 | IDECAW_CD | Cluster_11 | Cluster_12 | IDECAW : (μ2-Imidazol-1,3-diyl)-diaqua-bis(4-(4'-t-butylbenzyl)diethylenetriamine)-di-copper(ii) bis(β-cyclodextrin) clathrate triperchlorate nonadecahydrate |
| 175 | IHEGEI_CD | Cluster_7 | Cluster_7 | IHEGEI : β-Cyclodextrin (-)-menthyl-O-β-D-glucopyranoside clathrate hydrate |
| 176 | IJOLUO_CD | Cluster_12 | Cluster_11 | IJOLUO : β-Cyclodextrin ethanol clathrate dodecahydrate |
| 177 | IQEQOM_CD | Cluster_10 | Cluster_12 | IQEQOM : β-cyclodextrin (-)-epigallocatechin octahydrate |
| 178 | IQEQUS_CD | Cluster_13 | Cluster_12 | IQEQUS : β-cyclodextrin (-)-epicatechin gallate tetradecahydrate |
| 179 | IQEQUS01_CD | Cluster_13 | Cluster_12 | IQEQUS01 : β-Cyclodextrin (-)-epicatechin gallate clathrate tetradecahydrate |
| 180 | IQERON_CD | Cluster_9 | Cluster_9 | IQERON : β-Cyclodextrin (-)-epigallocatechin clathrate ethanol solvate heptahydrate |
| 181 | IRIFIZ_CD1 | Cluster_14 | Cluster_12 | IRIFIZ : bis(β-Cyclodextrin) 2-azidoadamantane clathrate hydrate |
| 182 | IRIFIZ_CD2 | Cluster_13 | Cluster_10 | IRIFIZ : bis(β-Cyclodextrin) 2-azidoadamantane clathrate hydrate |
| 183 | IXETAH_CD1 | Cluster_6 | Cluster_4 | IXETAH : (3)-bis(β-cyclodextrin)-(Igepal CO-520)-pseudorotaxane nonahydrate |
| 184 | IXETAH_CD2 | Cluster_11 | Cluster_6 | IXETAH : (3)-bis(β-cyclodextrin)-(Igepal CO-520)-pseudorotaxane nonahydrate |
| 185 | IYEFIE_CD1 | Cluster_12 | Cluster_10 | IYEFIE : β-cyclodextrin ketoprofen undecahydrate |
| 186 | IYEFIE_CD2 | Cluster_11 | Cluster_10 | IYEFIE : β-cyclodextrin ketoprofen undecahydrate |
| 187 | IZALEB_CD | Cluster_11 | Cluster_7 | IZALEB : β-Cyclodextrin nicotinic acid clathrate hydrate |
| 188 | JENDEP_CD1 | Cluster_11 | Cluster_12 | JENDEP : bis(β-cyclodextrin) fluconazole hydrate |
| 189 | JENDEP_CD2 | Cluster_10 | Cluster_5 | JENDEP : bis(β-cyclodextrin) fluconazole hydrate |
| 190 | JENDIT_CD | Cluster_13 | Cluster_11 | JENDIT : bis(β-cyclodextrin) fluconazole hydrate |
| 191 | JOFGUJ_CD | Cluster_7 | Cluster_11 | JOFGUJ : β-cyclodextrin caffeic acid hydrate |
| 192 | JOFKEX_CD1 | Cluster_17 | Cluster_17 | JOFKEX :  β-cyclodextrin quinic acid hydrate |
| 193 | JOFKEX_CD2 | Cluster_10 | Cluster_11 | JOFKEX :  β-cyclodextrin quinic acid hydrate |
| 194 | KEMZIN_CD | Cluster_10 | Cluster_13 | KEMZIN : β-cyclodextrin 7,7-dimethyl-2-methylenebicyclo[2.2.1]heptane decahydrate |
| 195 | KEXQUC_CD1 | Cluster_8 | Cluster_6 | KEXQUC : bis(β-cyclodextrin) cholesterol docosahydrate |
| 196 | KEXQUC_CD2 | Cluster_8 | Cluster_12 | KEXQUC : bis(β-cyclodextrin) cholesterol docosahydrate |
| 197 | KIFPAQ_CD1 | Cluster_12 | Cluster_12 | KIFPAQ : β-Cyclodextrin adamantanone clathrate hydrate |
| 198 | KIFPAQ_CD2 | Cluster_11 | Cluster_8 | KIFPAQ : β-Cyclodextrin adamantanone clathrate hydrate |
| 199 | KIJSEC_CD | Cluster_12 | Cluster_12 | KIJSEC : β-Cyclodextrin succinic acid clathrate heptahydrate |
| 200 | KOBRIC_CD | Cluster_9 | Cluster_5 | KOBRIC : Potassium β-cyclodextrin hydroxide octahydrate clathrate |
| 201 | KOFJEU_CD | Cluster_8 | Cluster_14 | KOFJEU : β-Cyclodextrin 4-t-butylbenzyl alcohol clathrate decahydrate |
| 202 | KOGLIB_CD | Cluster_11 | Cluster_14 | KOGLIB : (η5-Cyclopentadienyl)-(η6-mesitylene)-iron bis(β-cyclodextrin) hexafluorophosphate monohydrate clathrate |
| 203 | KOLGAU_CD1 | Cluster_9 | Cluster_9 | KOLGAU : 2β-Cyclodextrin sesquikis(benzoic acid) clathrate ethanol solvate hydrate |
| 204 | KOLGAU_CD2 | Cluster_12 | Cluster_15 | KOLGAU : 2β-Cyclodextrin sesquikis(benzoic acid) clathrate ethanol solvate hydrate |
| 205 | KUFHOI_CD | Cluster_17 | Cluster_15 | KUFHOI : β-Cyclodextrin octakis(pyridine) clathrate trihydrate |
| 206 | KUTJUE_CD1 | Cluster_8 | Cluster_12 | KUTJUE : bis(β-Cyclodextrin 4-t-butyltoluene) heptadecahydrate clathrate |
| 207 | KUTJUE_CD2 | Cluster_9 | Cluster_6 | KUTJUE : bis(β-Cyclodextrin 4-t-butyltoluene) heptadecahydrate clathrate |
| 208 | KUTKOZ_CD | Cluster_17 | Cluster_18 | KUTKOZ : β-Cyclodextrin 1,4-butanediol hydrate |
| 209 | LACTAL_CD | Cluster_7 | Cluster_12 | LACTAL : β-Cyclodextrin o-tolidine clathrate octahydrate |
| 210 | LACZEW_CD | Cluster_8 | Cluster_8 | LACZEW : β-cyclodextrin (4-nitrophenoxy)acetic acid clathrate hydrate |
| 211 | LADBAV_CD | Cluster_7 | Cluster_6 | LADBAV :  β-cyclodextrin glutaric acid clathrate hydrate |
| 212 | LADQOX_CD | Cluster_17 | Cluster_15 | LADQOX : β-Cyclodextrin diaqua-dichloro-copper(ii) hydrate |
| 213 | LEKGUE_CD | Cluster_5 | Cluster_11 | LEKGUE : bis(β-Cyclodextrin) tris(8-nitroquinoline) clathrate hydrate |
| 214 | LILLUN_CD | Cluster_4 | Cluster_11 | LILLUN :  β-Cyclodextrin sulfathiazole hydrate |
| 215 | MACCUP_CD1 | Cluster_10 | Cluster_5 | MACCUP : β-Cyclodextrin 1,2-bis(4-aminophenyl)ethane clathrate hydrate |
| 216 | MACCUP_CD2 | Cluster_15 | Cluster_14 | MACCUP : β-Cyclodextrin 1,2-bis(4-aminophenyl)ethane clathrate hydrate |
| 217 | MACDAW_CD1 | Cluster_11 | Cluster_13 | MACDAW : β-Cyclodextrin 4,4'-diaminobiphenyl clathrate hydrate |
| 218 | MACDAW_CD2 | Cluster_11 | Cluster_9 | MACDAW : β-Cyclodextrin 4,4'-diaminobiphenyl clathrate hydrate |
| 219 | MANNOE_CD | Cluster_9 | Cluster_10 | MANNOE : β-Cyclodextrin sodium meclofenamate clathrate hexadecahydrate |
| 220 | MASBAJ_CD | Cluster_10 | Cluster_9 | MASBAJ : β-Cyclodextrin 4,7-dimethylcoumarin clathrate heptadecahydrate |
| 221 | MASBIR_CD1 | Cluster_14 | Cluster_15 | MASBIR : β-Cyclodextrin 7-hydroxy-4-methylcoumarin clathrate hydrate |
| 222 | MASBIR_CD2 | Cluster_15 | Cluster_13 | MASBIR : β-Cyclodextrin 7-hydroxy-4-methylcoumarin clathrate hydrate |
| 223 | MASBOX_CD1 | Cluster_14 | Cluster_15 | MASBOX : bis(β-Cyclodextrin) 3,4':4,3'-bi(4,7-dimethylcoumarin) clathrate hydrate |
| 224 | MASBOX_CD2 | Cluster_17 | Cluster_15 | MASBOX : bis(β-Cyclodextrin) 3,4':4,3'-bi(4,7-dimethylcoumarin) clathrate hydrate |
| 225 | MAXTOW_CD1 | Cluster_14 | Cluster_12 | MAXTOW : β-cyclodextrin ethanol solvate hydrate |
| 226 | MAXTOW_CD2 | Cluster_17 | Cluster_15 | MAXTOW : β-cyclodextrin ethanol solvate hydrate |
| 227 | MEGQUK_CD | Cluster_7 | Cluster_6 | MEGQUK : β-Cyclodextrin 2-azi-5-hydroxyadamantane clathrate hydrate |
| 228 | MEJHAN_CD | Cluster_7 | Cluster_8 | MEJHAN : amitriptyline β-cyclodextrin hydrate |
| 229 | MEJHER_CD | Cluster_7 | Cluster_10 | MEJHER : β-cyclodextrin cyclobenzaprine hydrate |
| 230 | METTUE_CD | Cluster_13 | Cluster_10 | METTUE : protriptyline β-cyclodextrin chloride ethanol solvate hydrate |
| 231 | METVAM_CD | Cluster_8 | Cluster_12 | METVAM : maprotiline β-cyclodextrin chloride ethanol solvate hydrate |
| 232 | MIFHAK_CD | Cluster_7 | Cluster_6 | MIFHAK : β-Cyclodextrin squaric acid clathrate hydrate |
| 233 | MUPNEQ_CD | Cluster_2 | Cluster_2 | MUPNEQ : β-Cyclodextrin 2-((2,3-dimethylphenyl)amino)benzoic acid clathrate |
| 234 | MUPNEQ01_CD | Cluster_1 | Cluster_1 | MUPNEQ01 : β-Cyclodextrin 2-((2,3-dimethylphenyl)amino)benzoic acid clathrate |
| 235 | NAJJAK_CD1 | Cluster_11 | Cluster_11 | NAJJAK : β-Cyclodextrin sesquikis(2,2'-bithiophene) clathrate hydrate |
| 236 | NAJJAK_CD2 | Cluster_12 | Cluster_11 | NAJJAK : β-Cyclodextrin sesquikis(2,2'-bithiophene) clathrate hydrate |
| 237 | NATTAF_CD1 | Cluster_14 | Cluster_14 | NATTAF : β-cyclodextrin 2-methyl-4-chlorophenoxyacetic acid hydrate |
| 238 | NATTAF_CD2 | Cluster_12 | Cluster_13 | NATTAF : β-cyclodextrin 2-methyl-4-chlorophenoxyacetic acid hydrate |
| 239 | NILQUV_CD1 | Cluster_5 | Cluster_7 | NILQUV : β-Cyclodextrin 4-nitrobenzoic acid clathrate hydrate |
| 240 | NILQUV_CD2 | Cluster_10 | Cluster_17 | NILQUV : β-Cyclodextrin 4-nitrobenzoic acid clathrate hydrate |
| 241 | NUFTUE_CD | Cluster_7 | Cluster_11 | NUFTUE : β-Cyclodextrin propyl 4-hydroxy benzoate clathrate heptahydrate |
| 242 | NUFVEQ_CD | Cluster_17 | Cluster_13 | NUFVEQ : β-Cyclodextrin hemikis(pyrazinamide) clathrate hydrate |
| 243 | NUFVIU_CD | Cluster_15 | Cluster_16 | NUFVIU : β-Cyclodextrin hemikis(piperazine) clathrate hydrate |
| 244 | NUWHEV_CD1 | Cluster_11 | Cluster_12 | NUWHEV : bis(β-cyclodextrin) quetiapine unknown solvate tetrahydrate |
| 245 | NUWHEV_CD2 | Cluster_6 | Cluster_8 | NUWHEV : bis(β-cyclodextrin) quetiapine unknown solvate tetrahydrate |
| 246 | OCIGAK_CD1 | Cluster_8 | Cluster_10 | OCIGAK : tris(β-Cyclodextrin) sodium (bis(maleonitriledithiolato-S,S')-nickel(iii)) clathrate undecahydrate |
| 247 | OCIGAK_CD2 | Cluster_7 | Cluster_12 | OCIGAK : tris(β-Cyclodextrin) sodium (bis(maleonitriledithiolato-S,S')-nickel(iii)) clathrate undecahydrate |
| 248 | OCIGAK_CD3 | Cluster_10 | Cluster_9 | OCIGAK : tris(β-Cyclodextrin) sodium (bis(maleonitriledithiolato-S,S')-nickel(iii)) clathrate undecahydrate |
| 249 | ODEJOW_CD | Cluster_6 | Cluster_11 | ODEJOW : bis(β-Cyclodextrin) naphthyloxyacetic acid clathrate hydrate |
| 250 | ODUMIM_CD | Cluster_14 | Cluster_17 | ODUMIM : β-cyclodextrin 2-phenoxypropionic acid solvate hydrate |
| 251 | OFAXID_CD1 | Cluster_7 | Cluster_14 | OFAXID : β-Cyclodextrin 4-hydroxybiphenyl clathrate ethanol solvate hydrate |
| 252 | OFAXID_CD2 | Cluster_11 | Cluster_6 | OFAXID : β-Cyclodextrin 4-hydroxybiphenyl clathrate ethanol solvate hydrate |
| 253 | OFOHOG_CD | Cluster_9 | Cluster_7 | OFOHOG : β-Cyclodextrin aqua-n-butylcobaloxime clathrate tetradecahydrate |
| 254 | OFOHUM_CD | Cluster_11 | Cluster_10 | OFOHUM : β-Cyclodextrin aqua-cyclohexyl-cobaloxime clathrate decahydrate |
| 255 | OFOJAU_CD | Cluster_10 | Cluster_7 | OFOJAU : β-Cyclodextrin aqua-n-hexylcobaloxime clathrate dodecahydrate |
| 256 | OFOWAI_CD1 | Cluster_5 | Cluster_8 | OFOWAI : 4,4'-Propane-2,2-diyldiphenol β-cyclodextrin hydrate |
| 257 | OFOWAI_CD2 | Cluster_11 | Cluster_9 | OFOWAI : 4,4'-Propane-2,2-diyldiphenol β-cyclodextrin hydrate |
| 258 | OFOWIQ_CD1 | Cluster_5 | Cluster_10 | OFOWIQ : bis(β-Cyclodextrin) sesquikis(ethanol) clathrate nonadecahydrate |
| 259 | OFOWIQ_CD2 | Cluster_12 | Cluster_11 | OFOWIQ : bis(β-Cyclodextrin) sesquikis(ethanol) clathrate nonadecahydrate |
| 260 | OKAQAT_CD1 | Cluster_12 | Cluster_13 | OKAQAT : β-Cyclodextrin 4-(2-naphthyl)pyridine hydrate |
| 261 | OKAQAT_CD2 | Cluster_10 | Cluster_7 | OKAQAT : β-Cyclodextrin 4-(2-naphthyl)pyridine hydrate |
| 262 | OKUFOP_CD1 | Cluster_12 | Cluster_12 | OKUFOP : bis(β-Cyclodextrin) tetrakis(p-hydroxybenzaldehyde) clathrate hydrate |
| 263 | OKUFOP_CD2 | Cluster_11 | Cluster_6 | OKUFOP : bis(β-Cyclodextrin) tetrakis(p-hydroxybenzaldehyde) clathrate hydrate |
| 264 | OWAMEG_CD1 | Cluster_14 | Cluster_12 | OWAMEG : β-cyclodextrin (E)-N-((6-chloropyridin-3-yl)methyl)-N'-cyano-N-methylethanimidamide clathrate hydrate |
| 265 | OWAMEG_CD2 | Cluster_13 | Cluster_10 | OWAMEG : β-cyclodextrin (E)-N-((6-chloropyridin-3-yl)methyl)-N'-cyano-N-methylethanimidamide clathrate hydrate |
| 266 | OWIPUH_CD1 | Cluster_15 | Cluster_14 | OWIPUH : bis(β-cyclodextrin) rubidium tetrabromo-gold dodecahydrate |
| 267 | OWIPUH_CD2 | Cluster_15 | Cluster_12 | OWIPUH : bis(β-cyclodextrin) rubidium tetrabromo-gold dodecahydrate |
| 268 | OWIQIW_CD1 | Cluster_12 | Cluster_13 | OWIQIW : bis(β-cyclodextrin) sodium tetrabromo-gold unknown solvate octahydrate |
| 269 | OWIQIW_CD2 | Cluster_17 | Cluster_14 | OWIQIW : bis(β-cyclodextrin) sodium tetrabromo-gold unknown solvate octahydrate |
| 270 | OWIZOL_CD1 | Cluster_16 | Cluster_14 | OWIZOL : sodium β-cyclodextrin tetrachloro-gold unknown solvate trihydrate |
| 271 | OWIZOL_CD2 | Cluster_17 | Cluster_14 | OWIZOL : sodium β-cyclodextrin tetrachloro-gold unknown solvate trihydrate |
| 272 | OXAFUQ_CD | Cluster_7 | Cluster_7 | OXAFUQ : cyclodextrin decahydrate |
| 273 | OXAFUQ01_CD | Cluster_6 | Cluster_6 | OXAFUQ01 : β-Cyclodextrin decahydrate |
| 274 | PACHUX_CD | Cluster_10 | Cluster_12 | PACHUX : bis(β-Cyclodextrin) tris(1,10-phenanthroline) clathrate hydrate |
| 275 | PACJEJ_CD | Cluster_9 | Cluster_12 | PACJEJ : Neohesperidin dihydrochalcone β-cyclodextrin clathrate hydrate |
| 276 | PAJTON_CD | Cluster_8 | Cluster_12 | PAJTON : imipramine hydrochloride β-cyclodextrin ethanol solvate hydrate |
| 277 | PAKRAX_CD1 | Cluster_6 | Cluster_10 | PAKRAX : β-cyclodextrin (-)-isopulegol hydrate |
| 278 | PAKRAX_CD2 | Cluster_11 | Cluster_17 | PAKRAX : β-cyclodextrin (-)-isopulegol hydrate |
| 279 | PAKREB_CD1 | Cluster_5 | Cluster_9 | PAKREB : β-cyclodextrin (+)-isopulegol hydrate |
| 280 | PAKREB_CD2 | Cluster_11 | Cluster_17 | PAKREB : β-cyclodextrin (+)-isopulegol hydrate |
| 281 | PALBOX_CD | Cluster_14 | Cluster_15 | PALBOX : desipramine hydrochloride β-cyclodextrin ethanol solvate hydrate |
| 282 | PAZHAB_CD1 | Cluster_6 | Cluster_9 | PAZHAB : β-cyclodextrin 3-cyclooctyl-1,1-dimethylurea clathrate hydrate, β-cyclodextrin cycluron clathrate hydrate |
| 283 | PAZHAB_CD2 | Cluster_11 | Cluster_9 | PAZHAB : β-cyclodextrin 3-cyclooctyl-1,1-dimethylurea clathrate hydrate, β-cyclodextrin cycluron clathrate hydrate |
| 284 | PIJGIY_CD1 | Cluster_13 | Cluster_10 | PIJGIY : (β-Cyclodextrin) ethylene glycol octahydrate |
| 285 | PIJGIY_CD2 | Cluster_16 | Cluster_18 | PIJGIY : (β-Cyclodextrin) ethylene glycol octahydrate |
| 286 | PIJGOE_CD | Cluster_16 | Cluster_18 | PIJGOE : (β-Cyclodextrin) glycerol hydrate |
| 287 | POBRON_CD | Cluster_17 | Cluster_18 | POBRON : β-Cyclodextrin hydrate |
| 288 | POBRON01_CD | Cluster_6 | Cluster_7 | POBRON01 : β-Cyclodextrin nonahydrate |
| 289 | POHXUG_CD1 | Cluster_11 | Cluster_11 | POHXUG : β-Cyclodextrin hemikis(triclosan) clathrate ethanol solvate hydrate |
| 290 | POHXUG_CD2 | Cluster_7 | Cluster_10 | POHXUG : β-Cyclodextrin hemikis(triclosan) clathrate ethanol solvate hydrate |
| 291 | POVSIC_CD | Cluster_11 | Cluster_12 | POVSIC : β-Cyclodextrin trans-cyclohexane-1,4-diol hydrate |
| 292 | PUKPIU_CD | Cluster_12 | Cluster_11 | PUKPIU : bis(β-Cyclodextrin) octanol clathrate pyrene hydrate |
| 293 | PUKPOA_CD | Cluster_6 | Cluster_11 | PUKPOA : bis(β-Cyclodextrin) tris(cyclohexanol) clathrate pyrene hydrate |
| 294 | QACXEX_CD1 | Cluster_12 | Cluster_13 | QACXEX : β-Cyclodextrin p-amino-p'-nitrobiphenyl clathrate hydrate |
| 295 | QACXEX_CD2 | Cluster_6 | Cluster_10 | QACXEX : β-Cyclodextrin p-amino-p'-nitrobiphenyl clathrate hydrate |
| 296 | QORMUI_CD1 | Cluster_16 | Cluster_14 | QORMUI : geraniol β-cyclodextrin octahydrate |
| 297 | QORMUI_CD2 | Cluster_17 | Cluster_15 | QORMUI : geraniol β-cyclodextrin octahydrate |
| 298 | RASVUF_CD | Cluster_7 | Cluster_10 | RASVUF : β-cyclodextrin (1R)-(+)-camphor dodecahydrate |
| 299 | RASWAM_CD | Cluster_7 | Cluster_6 | RASWAM : β-cyclodextrin (1S)-(-)-camphor undecahydrate |
| 300 | RIBKET_CD1 | Cluster_11 | Cluster_6 | RIBKET : β-cyclodextrin dioxo-(salicylaldehyde 4-phenylbenzoylhydrazonato)-vanadium(v) clathrate potassium octahydrate |
| 301 | RIBKET_CD2 | Cluster_6 | Cluster_15 | RIBKET : β-cyclodextrin dioxo-(salicylaldehyde 4-phenylbenzoylhydrazonato)-vanadium(v) clathrate potassium octahydrate |
| 302 | RIPKIL_CD1 | Cluster_17 | Cluster_13 | RIPKIL : β-cyclodextrin N,N'-bis(pyridin-4-ylmethylene)hydrazine clathrate hydrate |
| 303 | RIPKIL_CD2 | Cluster_12 | Cluster_6 | RIPKIL : β-cyclodextrin N,N'-bis(pyridin-4-ylmethylene)hydrazine clathrate hydrate |
| 304 | RIPKIL_CD3 | Cluster_12 | Cluster_12 | RIPKIL : β-cyclodextrin N,N'-bis(pyridin-4-ylmethylene)hydrazine clathrate hydrate |
| 305 | SADCAE_CD | Cluster_15 | Cluster_10 | SADCAE : β-Cyclodextrin (+)-catechin pentahydrate |
| 306 | SADPIZ_CD | Cluster_16 | Cluster_16 | SADPIZ : β-Cyclodextrin (-)-epicatechin hydrate |
| 307 | SADPOF_CD1 | Cluster_6 | Cluster_10 | SADPOF : β-Cyclodextrin (-)-epicatechin clathrate ethanol solvate hydrate |
| 308 | SADPOF_CD2 | Cluster_11 | Cluster_6 | SADPOF : β-Cyclodextrin (-)-epicatechin clathrate ethanol solvate hydrate |
| 309 | SAQMOO_CD | Cluster_11 | Cluster_14 | SAQMOO : Di-potassium penta-rubidium β-cyclodextrin bis(μ9-phosphato)-hexatricontakis(μ2-oxo)-(4-iodophenyl)-heptadecaoxo-tin-heptadeca-tungsten icosahydrate |
| 310 | SAQQOU_CD1 | Cluster_5 | Cluster_10 | SAQQOU : 2,4'-dihydroxydiphenyl sulphone β-cyclodextrin hydrate |
| 311 | SAQQOU_CD2 | Cluster_8 | Cluster_8 | SAQQOU : 2,4'-dihydroxydiphenyl sulphone β-cyclodextrin hydrate |
| 312 | SAQQUA_CD1 | Cluster_11 | Cluster_8 | SAQQUA : 4,4'-dihydroxydiphenyl sulphone β-cyclodextrin hydrate |
| 313 | SAQQUA_CD2 | Cluster_12 | Cluster_10 | SAQQUA : 4,4'-dihydroxydiphenyl sulphone β-cyclodextrin hydrate |
| 314 | SATFEB_CD1 | Cluster_15 | Cluster_13 | SATFEB : bis(β-cyclodextrin) fentanyl clathrate hydrate |
| 315 | SATFEB_CD2 | Cluster_11 | Cluster_8 | SATFEB : bis(β-cyclodextrin) fentanyl clathrate hydrate |
| 316 | SIWYEF_CD1 | Cluster_5 | Cluster_16 | SIWYEF : β-cyclodextrin (-)-hyoscyamine hydrate |
| 317 | SIWYEF_CD2 | Cluster_9 | Cluster_8 | SIWYEF : β-cyclodextrin (-)-hyoscyamine hydrate |
| 318 | SOBHUM_CD1 | Cluster_5 | Cluster_10 | SOBHUM : (3)-(β-Cyclodextrin)-(tridecanoic acid)-(β-cyclodextrin)-pseudorotaxane hydrate |
| 319 | SOBHUM_CD2 | Cluster_10 | Cluster_6 | SOBHUM : (3)-(β-Cyclodextrin)-(tridecanoic acid)-(β-cyclodextrin)-pseudorotaxane hydrate |
| 320 | SOBHUM02_CD | Cluster_11 | Cluster_11 | SOBHUM02 : (3)-(β-Cyclodextrin)-(tridecanoic acid)-(β-cyclodextrin)-pseudorotaxane hydrate |
| 321 | SOBJEY_CD1 | Cluster_7 | Cluster_12 | SOBJEY : (3)-(β-Cyclodextrin)-(Z-7-tetradecenoic acid)-(β-cyclodextrin)-pseudorotaxane hydrate |
| 322 | SOBJEY_CD2 | Cluster_10 | Cluster_6 | SOBJEY : (3)-(β-Cyclodextrin)-(Z-7-tetradecenoic acid)-(β-cyclodextrin)-pseudorotaxane hydrate |
| 323 | SOBJEY02_CD | Cluster_11 | Cluster_11 | SOBJEY02 : (3)-(β-Cyclodextrin)-(Z-7-tetradecenoic acid)-(β-cyclodextrin)-pseudorotaxane hydrate |
| 324 | SOGMAE_CD | Cluster_8 | Cluster_4 | SOGMAE : β-cyclodextrin N,N-dimethylformamide solvate hydrate |
| 325 | SUJDAD_CD | Cluster_17 | Cluster_18 | SUJDAD : β-cyclodextrin hydrate clathrate |
| 326 | TAFZEG_CD1 | Cluster_15 | Cluster_14 | TAFZEG : bis(β-Cyclodextrin) bis(benzoic acid) ethanol clathrate hydrate |
| 327 | TAFZEG_CD2 | Cluster_12 | Cluster_13 | TAFZEG : bis(β-Cyclodextrin) bis(benzoic acid) ethanol clathrate hydrate |
| 328 | TECYIJ_CD | Cluster_11 | Cluster_14 | TECYIJ : β-Cyclodextrin 2-methyl-2,4-pentanediol hydrate |
| 329 | TEJHAR_CD1 | Cluster_15 | Cluster_12 | TEJHAR : β-Cyclodextrin nonanoic acid clathrate hydrate |
| 330 | TEJHAR_CD2 | Cluster_16 | Cluster_16 | TEJHAR : β-Cyclodextrin nonanoic acid clathrate hydrate |
| 331 | TEMCIX_CD | Cluster_10 | Cluster_11 | TEMCIX : β-Cyclodextrin spiroacetal clathrate nonahydrate |
| 332 | TEZZUV_CD | Cluster_13 | Cluster_7 | TEZZUV : 4-Allyl-2-methoxyphenol β-cyclodextrin hydrate |
| 333 | TIBBAJ_CD | Cluster_5 | Cluster_12 | TIBBAJ :  β-cyclodextrin 5-isopropyl-2-methylphenol octahydrate |
| 334 | TIBBEN_CD1 | Cluster_10 | Cluster_17 | TIBBEN : β-cyclodextrin 2-isopropyl-5-methylphenol octahydrate |
| 335 | TIBBEN_CD2 | Cluster_11 | Cluster_6 | TIBBEN : β-cyclodextrin 2-isopropyl-5-methylphenol octahydrate |
| 336 | TUSHUL_CD | Cluster_7 | Cluster_9 | TUSHUL : β-cyclodextrin monohydrate clathrate hydrate |
| 337 | TUXKUS_CD | Cluster_11 | Cluster_11 | TUXKUS : bis(β-Cyclodextrin) S-(+)-ibuprofen clathrate hydrate |
| 338 | UBOCUN_CD1 | Cluster_14 | Cluster_12 | UBOCUN : bis(μ-(4-hydroxybutyl)methylcarbamodithioato)-di-gold bis(β-cyclodextrin) hexadecahydrate |
| 339 | UBOCUN_CD2 | Cluster_13 | Cluster_10 | UBOCUN : bis(μ-(4-hydroxybutyl)methylcarbamodithioato)-di-gold bis(β-cyclodextrin) hexadecahydrate |
| 340 | UBODAU_CD1 | Cluster_10 | Cluster_3 | UBODAU : bis(μ-(2-hydroxy-2-methylpropyl)methylcarbamodithioato)-di-gold bis(β-cyclodextrin) tetracosahydrate |
| 341 | UBODAU_CD2 | Cluster_7 | Cluster_12 | UBODAU : bis(μ-(2-hydroxy-2-methylpropyl)methylcarbamodithioato)-di-gold bis(β-cyclodextrin) tetracosahydrate |
| 342 | UBODEY_CD1 | Cluster_12 | Cluster_9 | UBODEY : bis(μ-3-hydroxy-8-azabicyclo[3.2.1]octane-8-carbodithioato)-di-gold bis(β-cyclodextrin) methanol solvate hydrate |
| 343 | UBODEY_CD2 | Cluster_14 | Cluster_12 | UBODEY : bis(μ-3-hydroxy-8-azabicyclo[3.2.1]octane-8-carbodithioato)-di-gold bis(β-cyclodextrin) methanol solvate hydrate |
| 344 | UBODUO_CD1 | Cluster_17 | Cluster_15 | UBODUO : bis(μ-diethylcarbamodithioato)-di-gold bis(β-cyclodextrin) tridecahydrate |
| 345 | UBODUO_CD2 | Cluster_16 | Cluster_14 | UBODUO : bis(μ-diethylcarbamodithioato)-di-gold bis(β-cyclodextrin) tridecahydrate |
| 346 | UJEFEV_CD1 | Cluster_14 | Cluster_14 | UJEFEV : β-cyclodextrin quinolin-8-ol clathrate ethanol solvate triacontahydrate |
| 347 | UJEFEV_CD2 | Cluster_16 | Cluster_14 | UJEFEV : β-cyclodextrin quinolin-8-ol clathrate ethanol solvate triacontahydrate |
| 348 | UKAGOC_CD1 | Cluster_5 | Cluster_10 | UKAGOC : β-D-Cyclodextrin 4,4'-bipyridine clathrate hydrate |
| 349 | UKAGOC_CD2 | Cluster_9 | Cluster_8 | UKAGOC : β-D-Cyclodextrin 4,4'-bipyridine clathrate hydrate |
| 350 | UKIXAP_CD1 | Cluster_13 | Cluster_10 | UKIXAP : β-cyclodextrin (-)-linalool clathrate octahydrate |
| 351 | UKIXAP_CD2 | Cluster_9 | Cluster_5 | UKIXAP : β-cyclodextrin (-)-linalool clathrate octahydrate |
| 352 | UKIXET_CD | Cluster_7 | Cluster_10 | UKIXET : β-cyclodextrin sesquikis((-)-isopinocampheol) hydrate |
| 353 | UPULEX_CD | Cluster_13 | Cluster_10 | UPULEX : β-cyclodextrin 4-aminobenzoic acid clathrate decahydrate |
| 354 | UTAVOC_CD | Cluster_15 | Cluster_14 | UTAVOC : β-Cyclodextrin dichloro-N,N-bis(2-pyridylmethyl)amantadine-copper(ii) clathrate unknown solvate |
| 355 | UTAVUI_CD | Cluster_13 | Cluster_13 | UTAVUI : β-Cyclodextrin dichloro-N,N-bis(2-pyridylmethyl)amantadine-zinc(ii) clathrate unknown solvate |
| 356 | UYIKAP_CD1 | Cluster_8 | Cluster_14 | UYIKAP : bis(β-cyclodextrin) 1-(2-ethoxyethyl)-4-ethynyl-4-benzoyloxypiperidine hydrate |
| 357 | UYIKAP_CD2 | Cluster_11 | Cluster_6 | UYIKAP : bis(β-cyclodextrin) 1-(2-ethoxyethyl)-4-ethynyl-4-benzoyloxypiperidine hydrate |
| 358 | UYOKEB_CD | Cluster_14 | Cluster_13 | UYOKEB : β-cyclodextrin 4-ethynyl-1-methylpiperidin-4-ol heptahydrate |
| 359 | VACZIJ_CD | Cluster_14 | Cluster_13 | VACZIJ : β-Cyclodextrin hemikis(dimethyl sulfoxide) clathrate hydrate |
| 360 | VAKJEZ_CD | Cluster_12 | Cluster_11 | VAKJEZ : β-Cyclodextrin triclosan clathrate hydrate |
| 361 | VIBJIA_CD | Cluster_11 | Cluster_15 | VIBJIA : β-cyclodextrin diaqua-(bis(2-aminoethyl)(4-t-butylphenylmethyl)amine-N,N',N'')-zinc(ii) clathrate diperchlorate hydrate |
| 362 | VIJXAN10_CD | Cluster_11 | Cluster_11 | VIJXAN10 : β-Cyclodextrin 3,3-dimethylbutylamine clathrate hydrate |
| 363 | VOFJIK_CD1 | Cluster_5 | Cluster_6 | VOFJIK : bis(β-Cyclodextrin) tris(o-aminobenzoic acid) clathrate hydrate |
| 364 | VOFJIK_CD2 | Cluster_8 | Cluster_8 | VOFJIK : bis(β-Cyclodextrin) tris(o-aminobenzoic acid) clathrate hydrate |
| 365 | VOJLIQ_CD | Cluster_7 | Cluster_6 | VOJLIQ : β-Cyclodextrin p-aminobenzoic acid clathrate pentahydrate |
| 366 | VOQDOU_CD1 | Cluster_13 | Cluster_12 | VOQDOU : bis(β-Cyclodextrin) bis(N-acetyl-L-phenylalanine amide) clathrate hydrate |
| 367 | VOQDOU_CD2 | Cluster_16 | Cluster_17 | VOQDOU : bis(β-Cyclodextrin) bis(N-acetyl-L-phenylalanine amide) clathrate hydrate |
| 368 | VOQDUA_CD1 | Cluster_14 | Cluster_12 | VOQDUA : bis(β-Cyclodextrin) bis(N-acetyl-p-methoxy-L-phenylalanine methyl ester) clathrate hydrate |
| 369 | VOQDUA_CD2 | Cluster_15 | Cluster_14 | VOQDUA : bis(β-Cyclodextrin) bis(N-acetyl-p-methoxy-L-phenylalanine methyl ester) clathrate hydrate |
| 370 | VUWLAD_CD1 | Cluster_17 | Cluster_12 | VUWLAD : 2,2'-{[3-(5H-dibenzo[b,f]azepin-5-yl)propyl]azanediyl}bis(ethan-1-ol) β-cyclodextrin heptadecahydrate |
| 371 | VUWLAD_CD2 | Cluster_15 | Cluster_10 | VUWLAD : 2,2'-{[3-(5H-dibenzo[b,f]azepin-5-yl)propyl]azanediyl}bis(ethan-1-ol) β-cyclodextrin heptadecahydrate |
| 372 | VUYGUT_CD1 | Cluster_5 | Cluster_9 | VUYGUT : β-Cyclodextrin geraniol hydrate |
| 373 | VUYGUT_CD2 | Cluster_11 | Cluster_17 | VUYGUT : β-Cyclodextrin geraniol hydrate |
| 374 | VUYHAA_CD1 | Cluster_13 | Cluster_14 | VUYHAA : β-Cyclodextrin (-)-α-terpineol hydrate |
| 375 | VUYHAA_CD2 | Cluster_15 | Cluster_12 | VUYHAA : β-Cyclodextrin (-)-α-terpineol hydrate |
| 376 | VUYHEE_CD1 | Cluster_14 | Cluster_13 | VUYHEE : β-Cyclodextrin (+)-α-terpineol nonahydrate |
| 377 | VUYHEE_CD2 | Cluster_16 | Cluster_13 | VUYHEE : β-Cyclodextrin (+)-α-terpineol nonahydrate |
| 378 | WANMII_CD1 | Cluster_8 | Cluster_10 | WANMII : tetrakis(β-Cyclodextrin) pentakis(ferrocene) clathrate hydrate |
| 379 | WANMII_CD2 | Cluster_12 | Cluster_8 | WANMII : tetrakis(β-Cyclodextrin) pentakis(ferrocene) clathrate hydrate |
| 380 | WERGOQ_CD | Cluster_11 | Cluster_13 | WERGOQ : Calcium bis(β-cyclodextrin) bis(meclofenamate) clathrate hydrate |
| 381 | WERGUW_CD | Cluster_11 | Cluster_10 | WERGUW : Magnesium bis(β-cyclodextrin) bis(meclofenamate) clathrate hydrate |
| 382 | WEWTOJ_CD | Cluster_13 | Cluster_11 | WEWTOJ : β-cyclodextrin |
| 383 | WEZSIE_CD | Cluster_15 | Cluster_14 | WEZSIE : β-Cyclodextrin hemikis(suprofen) clathrate decahydrate |
| 384 | WISREV_CD1 | Cluster_12 | Cluster_12 | WISREV : (3)-bis(β-Cyclodextrin)-(1,12-dodecanedioic acid)-pseudorotaxane ethanol solvate hydrate |
| 385 | WISREV_CD2 | Cluster_16 | Cluster_14 | WISREV : (3)-bis(β-Cyclodextrin)-(1,12-dodecanedioic acid)-pseudorotaxane ethanol solvate hydrate |
| 386 | WUKJOD_CD1 | Cluster_11 | Cluster_7 | WUKJOD : nona-aqua-lanthanum (μ-phosphato)-tetracosakis(μ-oxo)-dodecaoxo-dodeca-molybdenum bis(β-cyclodextrin) unknown solvate heptacosahydrate |
| 387 | WUKJOD_CD2 | Cluster_11 | Cluster_11 | WUKJOD : nona-aqua-lanthanum (μ-phosphato)-tetracosakis(μ-oxo)-dodecaoxo-dodeca-molybdenum bis(β-cyclodextrin) unknown solvate heptacosahydrate |
| 388 | XADHIT_CD1 | Cluster_13 | Cluster_12 | XADHIT : β-cyclodextrin p-bromoacetanilide clathrate hydrate |
| 389 | XADHIT_CD2 | Cluster_10 | Cluster_11 | XADHIT : β-cyclodextrin p-bromoacetanilide clathrate hydrate |
| 390 | XAMDEX_CD1 | Cluster_11 | Cluster_7 | XAMDEX : β-cyclodextrin 3-(4-hydroxyphenyl)-2H-1-benzopyran-7-ol clathrate tridecahydrate |
| 391 | XAMDEX_CD2 | Cluster_8 | Cluster_8 | XAMDEX : β-cyclodextrin 3-(4-hydroxyphenyl)-2H-1-benzopyran-7-ol clathrate tridecahydrate |
| 392 | XASRES_CD1 | Cluster_13 | Cluster_12 | XASRES : β-cyclodextrin bentazon clathrate unknown solvate hexahydrate |
| 393 | XASRES_CD2 | Cluster_12 | Cluster_5 | XASRES : β-cyclodextrin bentazon clathrate unknown solvate hexahydrate |
| 394 | XEGTAF_CD | Cluster_15 | Cluster_12 | XEGTAF : β-cyclodextrin 2-(hydroxy(6-methoxyquinolin-4-yl)methyl)-5-vinylquinuclidine clathrate hydrate |
| 395 | XERTET_CD | Cluster_12 | Cluster_11 | XERTET : β-Cyclodextrin trans-cinnamic acid hydrate clathrate |
| 396 | XETNIW_CD | Cluster_7 | Cluster_7 | XETNIW : β-cyclodextrin (-)-gallocatechin ethanol solvate hydrate |
| 397 | XOPGIS_CD1 | Cluster_15 | Cluster_16 | XOPGIS : β-cyclodextrin bis(cesium niflumate)hydrate |
| 398 | XOPGIS_CD2 | Cluster_16 | Cluster_15 | XOPGIS : β-cyclodextrin bis(cesium niflumate)hydrate |
| 399 | XORYOV_CD1 | Cluster_7 | Cluster_13 | XORYOV : tetrakis(Potassium) bis(β-cyclodextrin) (octakis(μ-sulfido)-hexacyano-hexa-rhenium) clathrate bis(β-cyclodextrin) tritriacontahydrate |
| 400 | XORYOV_CD2 | Cluster_12 | Cluster_11 | XORYOV : tetrakis(Potassium) bis(β-cyclodextrin) (octakis(μ-sulfido)-hexacyano-hexa-rhenium) clathrate bis(β-cyclodextrin) tritriacontahydrate |
| 401 | XORYOV_CD3 | Cluster_10 | Cluster_10 | XORYOV : tetrakis(Potassium) bis(β-cyclodextrin) (octakis(μ-sulfido)-hexacyano-hexa-rhenium) clathrate bis(β-cyclodextrin) tritriacontahydrate |
| 402 | XORYOV_CD4 | Cluster_6 | Cluster_12 | XORYOV : tetrakis(Potassium) bis(β-cyclodextrin) (octakis(μ-sulfido)-hexacyano-hexa-rhenium) clathrate bis(β-cyclodextrin) tritriacontahydrate |
| 403 | XORYUB_CD1 | Cluster_15 | Cluster_14 | XORYUB : tetrakis(Potassium) bis(β-cyclodextrin) (octakis(μ-selenido)-hexacyano-hexa-rhenium) clathrate bis(β-cyclodextrin) henicosahydrate |
| 404 | XORYUB_CD2 | Cluster_10 | Cluster_7 | XORYUB : tetrakis(Potassium) bis(β-cyclodextrin) (octakis(μ-selenido)-hexacyano-hexa-rhenium) clathrate bis(β-cyclodextrin) henicosahydrate |
| 405 | XORYUB_CD3 | Cluster_15 | Cluster_10 | XORYUB : tetrakis(Potassium) bis(β-cyclodextrin) (octakis(μ-selenido)-hexacyano-hexa-rhenium) clathrate bis(β-cyclodextrin) henicosahydrate |
| 406 | XORYUB_CD4 | Cluster_12 | Cluster_13 | XORYUB : tetrakis(Potassium) bis(β-cyclodextrin) (octakis(μ-selenido)-hexacyano-hexa-rhenium) clathrate bis(β-cyclodextrin) henicosahydrate |
| 407 | XORZAI_CD1 | Cluster_8 | Cluster_13 | XORZAI : tetrakis(Potassium) bis(β-cyclodextrin) (octakis(μ-tellurido)-hexacyano-hexa-rhenium) clathrate bis(β-cyclodextrin) pentacosahydrate |
| 408 | XORZAI_CD2 | Cluster_12 | Cluster_8 | XORZAI : tetrakis(Potassium) bis(β-cyclodextrin) (octakis(μ-tellurido)-hexacyano-hexa-rhenium) clathrate bis(β-cyclodextrin) pentacosahydrate |
| 409 | XORZAI_CD3 | Cluster_7 | Cluster_12 | XORZAI : tetrakis(Potassium) bis(β-cyclodextrin) (octakis(μ-tellurido)-hexacyano-hexa-rhenium) clathrate bis(β-cyclodextrin) pentacosahydrate |
| 410 | XORZAI_CD4 | Cluster_11 | Cluster_11 | XORZAI : tetrakis(Potassium) bis(β-cyclodextrin) (octakis(μ-tellurido)-hexacyano-hexa-rhenium) clathrate bis(β-cyclodextrin) pentacosahydrate |
| 411 | XUBXUN_CD1 | Cluster_16 | Cluster_10 | XUBXUN : bis(β-Cyclodextrin) bis((Z)-7-tetradecenal) clathrate hydrate |
| 412 | XUBXUN_CD2 | Cluster_8 | Cluster_2 | XUBXUN : bis(β-Cyclodextrin) bis((Z)-7-tetradecenal) clathrate hydrate |
| 413 | XUHTID_CD1 | Cluster_12 | Cluster_8 | XUHTID : rac-Terfenadine bis(β-cyclodextrin) hemikis(tartaric acid) hydrate |
| 414 | XUHTID_CD2 | Cluster_11 | Cluster_12 | XUHTID : rac-Terfenadine bis(β-cyclodextrin) hemikis(tartaric acid) hydrate |
| 415 | XUVJEG_CD1 | Cluster_5 | Cluster_10 | XUVJEG : β-cyclodextrin dimethylformamide toluene solvate |
| 416 | XUVJEG_CD2 | Cluster_9 | Cluster_8 | XUVJEG : β-cyclodextrin dimethylformamide toluene solvate |
| 417 | XUVJIK_CD1 | Cluster_7 | Cluster_18 | XUVJIK : β-cyclodextrin 1,4-dioxane solvate heptahydrate |
| 418 | XUVJIK_CD2 | Cluster_12 | Cluster_10 | XUVJIK : β-cyclodextrin 1,4-dioxane solvate heptahydrate |
| 419 | XUXFAY_CD | Cluster_16 | Cluster_14 | XUXFAY : β-Cyclodextrin S-p-tolyl t-butylthiosulfinate clathrate hydrate |
| 420 | YAMVIV_CD1 | Cluster_14 | Cluster_13 | YAMVIV : catena-[bis(μ-β-cyclodextrin)-octaaqua-tri-potassium trihydroxide ethanol solvate octahydrate] |
| 421 | YAMVIV_CD2 | Cluster_12 | Cluster_8 | YAMVIV : catena-[bis(μ-β-cyclodextrin)-octaaqua-tri-potassium trihydroxide ethanol solvate octahydrate] |
| 422 | YAMVOB_CD1 | Cluster_12 | Cluster_12 | YAMVOB : tri-calcium octakis(β-cyclodextrin) hexachloride tripentacontahectahydrate |
| 423 | YAMVOB_CD2 | Cluster_13 | Cluster_15 | YAMVOB : tri-calcium octakis(β-cyclodextrin) hexachloride tripentacontahectahydrate |
| 424 | YIHJEG_CD1 | Cluster_15 | Cluster_13 | YIHJEG : potassium tetrachloro-gold(iii) bis(β-cyclodextrin) unknown solvate hydrate |
| 425 | YIHJEG_CD2 | Cluster_13 | Cluster_13 | YIHJEG : potassium tetrachloro-gold(iii) bis(β-cyclodextrin) unknown solvate hydrate |
| 426 | YIHJIK_CD1 | Cluster_15 | Cluster_14 | YIHJIK : Potassium tetrabromo-gold(iii) bis(β-cyclodextrin) unknown solvate dihydrate |
| 427 | YIHJIK_CD2 | Cluster_16 | Cluster_13 | YIHJIK : Potassium tetrabromo-gold(iii) bis(β-cyclodextrin) unknown solvate dihydrate |
| 428 | YIYSII_CD | Cluster_17 | Cluster_18 | YIYSII : β-Cyclodextrin diethanolamine hydrate |
| 429 | YIYSOO_CD | Cluster_14 | Cluster_15 | YIYSOO : β-Cyclodextrin 1,5-pentanediol hydrate |
| 430 | YOJHUC_CD1 | Cluster_10 | Cluster_9 | YOJHUC : β-Cyclodextrin bis(4-aminophenyl) disulfide clathrate hydrate |
| 431 | YOJHUC_CD2 | Cluster_12 | Cluster_10 | YOJHUC : β-Cyclodextrin bis(4-aminophenyl) disulfide clathrate hydrate |
| 432 | YOVVIO_CD1 | Cluster_10 | Cluster_5 | YOVVIO : bis(β-Cyclodextrin) 3,5-dimethylbenzoic acid hydrate clathrate |
| 433 | YOVVIO_CD2 | Cluster_11 | Cluster_3 | YOVVIO : bis(β-Cyclodextrin) 3,5-dimethylbenzoic acid hydrate clathrate |
| 434 | YOVVIO01_CD | Cluster_12 | Cluster_12 | YOVVIO01 : β-Cyclodextrin 3,5-dimethylbenzoic acid hydrate clathrate |
| 435 | ZIGZIY_CD | Cluster_15 | Cluster_17 | ZIGZIY : β-Cyclodextrin but-2-yne-1,4-diol heptahydrate clathrate |
| 436 | ZUNVEL_CD | Cluster_7 | Cluster_6 | ZUNVEL : β-Cyclodextrin di-sodium dihydroxide hemihydrate |
| 437 | ZUZXOH_CD | Cluster_6 | Cluster_11 | ZUZXOH : β-Cyclodextrin (Z)-9-dodecen-1-ol clathrate ethanol solvate hydrate |

Table S. Descriptive statistics of Gibbs free energy values calculated using PCM solvation model for each cluster.

| **Descriptive statistics of G value (PCM)** |  |  |  |  |  |  |  |  |  |  |  |  |  |  |  |  |  |
| --- | --- | --- | --- | --- | --- | --- | --- | --- | --- | --- | --- | --- | --- | --- | --- | --- | --- |
|  | **Cluster_1** | **Cluster_2** | **Cluster_3** | **Cluster_4** | **Cluster_5** | **Cluster_6** | **Cluster_7** | **Cluster_8** | **Cluster_9** | **Cluster_10** | **Cluster_11** | **Cluster_12** | **Cluster_13** | **Cluster_14** | **Cluster_15** | **Cluster_16** | **Cluster_17** |
| **Number of values** | 1 | 1 | 1 | 4 | 20 | 22 | 33 | 30 | 20 | 34 | 58 | 57 | 30 | 26 | 43 | 28 | 29 |
|  |  |  |  |  |  |  |  |  |  |  |  |  |  |  |  |  |  |
| **Minimum** | -2682290.263 | -2682292.384 | -2682302.138 | -2682312.852 | -2682315.456 | -2682317.197 | -2682319.134 | -2682320.178 | -2682321.100 | -2682321.855 | -2682323.037 | -2682324.753 | -2682325.412 | -2682326.225 | -2682327.280 | -2682328.139 | -2682330.157 |
| **25% Percentile** | -2682290.263 | -2682292.384 | -2682302.138 | -2682312.541 | -2682315.271 | -2682317.039 | -2682318.628 | -2682319.975 | -2682321.068 | -2682321.752 | -2682322.845 | -2682324.266 | -2682325.229 | -2682326.075 | -2682327.144 | -2682327.896 | -2682329.447 |
| **Median** | -2682290.263 | -2682292.384 | -2682302.138 | -2682311.133 | -2682314.964 | -2682316.558 | -2682318.177 | -2682319.777 | -2682320.680 | -2682321.599 | -2682322.627 | -2682324.056 | -2682325.122 | -2682325.851 | -2682326.910 | -2682327.820 | -2682329.076 |
| **75% Percentile** | -2682290.263 | -2682292.384 | -2682302.138 | -2682309.748 | -2682314.668 | -2682315.982 | -2682317.878 | -2682319.536 | -2682320.489 | -2682321.422 | -2682322.251 | -2682323.602 | -2682325.002 | -2682325.825 | -2682326.616 | -2682327.614 | -2682328.711 |
| **Maximum** | -2682290.263 | -2682292.384 | -2682302.138 | -2682309.445 | -2682314.613 | -2682315.655 | -2682317.408 | -2682319.272 | -2682320.391 | -2682321.251 | -2682321.944 | -2682323.169 | -2682324.840 | -2682325.556 | -2682326.354 | -2682327.434 | -2682328.282 |
| **Range** | 0.000 | 0.000 | 0.000 | 3.407 | 0.843 | 1.542 | 1.726 | 0.906 | 0.709 | 0.604 | 1.093 | 1.584 | 0.573 | 0.670 | 0.926 | 0.705 | 1.875 |
|  |  |  |  |  |  |  |  |  |  |  |  |  |  |  |  |  |  |
| **95% CI of median** |  |  |  |  |  |  |  |  |  |  |  |  |  |  |  |  |  |
| **Actual confidence level** | 5.00% | 5.00% | 5.00% | 87.50% | 95.86% | 98.31% | 96.49% | 95.72% | 95.86% | 97.57% | 95.21% | 96.69% | 95.72% | 97.10% | 96.85% | 96.43% | 97.59% |
| **Lower confidence limit** |  |  |  | -2682312.852 | -2682315.089 | -2682317.033 | -2682318.531 | -2682319.968 | -2682321.06 | -2682321.738 | -2682322.702 | -2682324.206 | -2682325.212 | -2682326.052 | -2682327.068 | -2682327.879 | -2682329.335 |
| **Upper confidence limit** |  |  |  | -2682309.445 | -2682314.693 | -2682316.024 | -2682318.022 | -2682319.549 | -2682320.492 | -2682321.455 | -2682322.484 | -2682323.782 | -2682325.007 | -2682325.832 | -2682326.752 | -2682327.623 | -2682328.714 |
|  |  |  |  |  |  |  |  |  |  |  |  |  |  |  |  |  |  |
| **Mean** | -2682290.263 | -2682292.384 | -2682302.138 | -2682311.141 | -2682314.963 | -2682316.52 | -2682318.248 | -2682319.739 | -2682320.751 | -2682321.594 | -2682322.562 | -2682323.977 | -2682325.115 | -2682325.915 | -2682326.869 | -2682327.774 | -2682329.086 |
| **Std. Deviation** | 0 | 0 | 0 | 1.443758234 | 0.280478589 | 0.535194103 | 0.465945335 | 0.265226209 | 0.278428187 | 0.174605385 | 0.310138862 | 0.41602779 | 0.157219118 | 0.197050505 | 0.290363957 | 0.199371435 | 0.483746894 |
| **Std. Error of Mean** | 0 | 0 | 0 | 0.721879117 | 0.062716919 | 0.114103766 | 0.081110672 | 0.048423459 | 0.062258435 | 0.029944576 | 0.040723228 | 0.055104227 | 0.028704153 | 0.038644783 | 0.044280088 | 0.03767766 | 0.089829543 |
|  |  |  |  |  |  |  |  |  |  |  |  |  |  |  |  |  |  |
| **Lower 95% CI of mean** |  |  |  | -2682313.438 | -2682315.095 | -2682316.757 | -2682318.413 | -2682319.838 | -2682320.881 | -2682321.654 | -2682322.643 | -2682324.088 | -2682325.174 | -2682325.995 | -2682326.959 | -2682327.851 | -2682329.27 |
| **Upper 95% CI of mean** |  |  |  | -2682308.843 | -2682314.832 | -2682316.282 | -2682318.083 | -2682319.640 | -2682320.620 | -2682321.533 | -2682322.480 | -2682323.867 | -2682325.056 | -2682325.836 | -2682326.780 | -2682327.696 | -2682328.902 |
|  |  |  |  |  |  |  |  |  |  |  |  |  |  |  |  |  |  |
| **Test for normal distribution** |  |  |  |  |  |  |  |  |  |  |  |  |  |  |  |  |  |
| **Shapiro-Wilk test** |  |  |  |  |  |  |  |  |  |  |  |  |  |  |  |  |  |
| **W** | N too small | N too small | N too small | 0.9988 | 0.9065 | 0.8977 | 0.9691 | 0.9167 | 0.8391 | 0.9434 | 0.9409 | 0.9502 | 0.9676 | 0.9427 | 0.9294 | 0.9578 | 0.9589 |
| **P value** |  |  |  | 0.9964 | 0.0546 | 0.0268 | 0.4554 | 0.022 | 0.0035 | 0.0781 | 0.0071 | 0.0201 | 0.4748 | 0.1555 | 0.0111 | 0.3095 | 0.3083 |
| **Passed normality test (alpha=0.05)?** |  |  |  | Yes | Yes | No | Yes | No | No | Yes | No | No | Yes | Yes | No | Yes | Yes |
| **P value summary** |  |  |  | ns | ns | * | ns | * | ** | ns | ** | * | ns | ns | * | ns | ns |

Table S. Descriptive statistics of electronic energy values with zero point energy (EE+ZPE) calculated using PCM solvation model for each cluster.

| **Descriptive statistics of EE+ZPE (PCM)** |  |  |  |  |  |  |  |  |  |  |  |  |  |  |  |  |  |
| --- | --- | --- | --- | --- | --- | --- | --- | --- | --- | --- | --- | --- | --- | --- | --- | --- | --- |
|  | Cluster_1 | Cluster_2 | Cluster_3 | Cluster_4 | Cluster_5 | Cluster_6 | Cluster_7 | Cluster_8 | Cluster_9 | Cluster_10 | Cluster_11 | Cluster_12 | Cluster_13 | Cluster_14 | Cluster_15 | Cluster_16 | Cluster_17 |
| **Number of values** | 1 | 1 | 1 | 4 | 20 | 22 | 33 | 30 | 20 | 34 | 58 | 57 | 30 | 26 | 43 | 28 | 29 |
|  |  |  |  |  |  |  |  |  |  |  |  |  |  |  |  |  |  |
| **Minimum** | -2682222.884 | -2682224.890 | -2682237.459 | -2682243.823 | -2682247.356 | -2682249.840 | -2682251.517 | -2682252.514 | -2682254.346 | -2682254.621 | -2682255.569 | -2682257.813 | -2682258.726 | -2682259.621 | -2682260.133 | -2682261.048 | -2682262.701 |
| **25% Percentile** | -2682222.884 | -2682224.890 | -2682237.459 | -2682243.635 | -2682247.031 | -2682248.929 | -2682250.590 | -2682251.936 | -2682253.046 | -2682253.843 | -2682254.887 | -2682256.249 | -2682257.964 | -2682258.212 | -2682259.661 | -2682260.726 | -2682261.942 |
| **Median** | -2682222.884 | -2682224.890 | -2682237.459 | -2682242.921 | -2682246.542 | -2682248.145 | -2682249.655 | -2682251.728 | -2682253.017 | -2682253.436 | -2682254.425 | -2682255.903 | -2682257.053 | -2682257.518 | -2682259.179 | -2682260.162 | -2682261.190 |
| **75% Percentile** | -2682222.884 | -2682224.890 | -2682237.459 | -2682242.144 | -2682246.492 | -2682247.923 | -2682249.486 | -2682251.232 | -2682252.127 | -2682253.156 | -2682254.022 | -2682255.671 | -2682256.837 | -2682257.136 | -2682258.663 | -2682259.601 | -2682260.066 |
| **Maximum** | -2682222.884 | -2682224.890 | -2682237.459 | -2682241.935 | -2682245.906 | -2682246.403 | -2682247.767 | -2682250.896 | -2682250.977 | -2682252.507 | -2682253.189 | -2682254.480 | -2682256.096 | -2682256.880 | -2682256.915 | -2682258.466 | -2682259.221 |
| **Range** | 0.000 | 0.000 | 0.000 | 1.888 | 1.450 | 3.436 | 3.750 | 1.618 | 3.369 | 2.113 | 2.380 | 3.333 | 2.631 | 2.740 | 3.218 | 2.582 | 3.480 |
|  |  |  |  |  |  |  |  |  |  |  |  |  |  |  |  |  |  |
| **95% CI of median** |  |  |  |  |  |  |  |  |  |  |  |  |  |  |  |  |  |
| **Actual confidence level** | 5.00% | 5.00% | 5.00% | 87.50% | 95.86% | 98.31% | 96.49% | 95.72% | 95.86% | 97.57% | 95.21% | 96.69% | 95.72% | 97.10% | 96.85% | 96.43% | 97.59% |
| **Lower confidence limit** |  |  |  | -2682243.823 | -2682246.751 | -2682248.929 | -2682250.365 | -2682251.933 | -2682253.041 | -2682253.775 | -2682254.660 | -2682256.103 | -2682257.833 | -2682258.091 | -2682259.456 | -2682260.546 | -2682261.674 |
| **Upper confidence limit** |  |  |  | -2682241.935 | -2682246.493 | -2682247.931 | -2682249.589 | -2682251.296 | -2682252.180 | -2682253.198 | -2682254.198 | -2682255.754 | -2682256.870 | -2682257.137 | -2682258.890 | -2682259.837 | -2682260.928 |
|  |  |  |  |  |  |  |  |  |  |  |  |  |  |  |  |  |  |
| **Mean** | -2682222.884 | -2682224.890 | -2682237.459 | -2682242.900 | -2682246.664 | -2682248.278 | -2682249.911 | -2682251.612 | -2682252.803 | -2682253.501 | -2682254.412 | -2682256.018 | -2682257.308 | -2682257.742 | -2682259.072 | -2682260.008 | -2682261.115 |
| **Std. Deviation** | 0.000 | 0.000 | 0.000 | 0.781 | 0.363 | 0.698 | 0.818 | 0.447 | 0.829 | 0.493 | 0.561 | 0.653 | 0.704 | 0.742 | 0.670 | 0.798 | 0.985 |
| **Std. Error of Mean** | 0.000 | 0.000 | 0.000 | 0.390 | 0.081 | 0.149 | 0.142 | 0.082 | 0.185 | 0.085 | 0.074 | 0.086 | 0.128 | 0.146 | 0.102 | 0.151 | 0.183 |
|  |  |  |  |  |  |  |  |  |  |  |  |  |  |  |  |  |  |
| **Lower 95% CI of mean** |  |  |  | -2682244.143 | -2682246.834 | -2682248.587 | -2682250.201 | -2682251.779 | -2682253.191 | -2682253.673 | -2682254.559 | -2682256.192 | -2682257.571 | -2682258.041 | -2682259.278 | -2682260.317 | -2682261.490 |
| **Upper 95% CI of mean** |  |  |  | -2682241.657 | -2682246.495 | -2682247.968 | -2682249.621 | -2682251.445 | -2682252.415 | -2682253.329 | -2682254.264 | -2682255.845 | -2682257.045 | -2682257.442 | -2682258.866 | -2682259.699 | -2682260.740 |
|  |  |  |  |  |  |  |  |  |  |  |  |  |  |  |  |  |  |
| **Test for normal distribution** |  |  |  |  |  |  |  |  |  |  |  |  |  |  |  |  |  |
| **Shapiro-Wilk test** |  |  |  |  |  |  |  |  |  |  |  |  |  |  |  |  |  |
| **W** | N too small | N too small | N too small | 0.9928 | 0.9014 | 0.9271 | 0.9727 | 0.9483 | 0.9435 | 0.9686 | 0.9816 | 0.9651 | 0.9487 | 0.8933 | 0.9353 | 0.9143 | 0.9399 |
| **P value** |  |  |  | 0.9711 | 0.0438 | 0.1068 | 0.5579 | 0.1523 | 0.2786 | 0.4252 | 0.5237 | 0.0991 | 0.156 | 0.0111 | 0.0177 | 0.0252 | 0.0994 |
| **Passed normality test (alpha=0.05)?** |  |  |  | Yes | No | Yes | Yes | Yes | Yes | Yes | Yes | Yes | Yes | No | No | No | Yes |
| **P value summary** |  |  |  | ns | * | ns | ns | ns | ns | ns | ns | ns | ns | * | * | * | ns |

Table S. Descriptive statistics of Gibbs free energy values calculated in vacuo for each cluster.

| **Descriptive statistics of G values (in vacuo)** |  |  |  |  |  |  |  |  |  |  |  |  |  |  |  |  |  |  |
| --- | --- | --- | --- | --- | --- | --- | --- | --- | --- | --- | --- | --- | --- | --- | --- | --- | --- | --- |
|  | **Cluster_1** | **Cluster_2** | **Cluster_3** | **Cluster_4** | **Cluster_5** | **Cluster_6** | **Cluster_7** | **Cluster_8** | **Cluster_9** | **Cluster_10** | **Cluster_11** | **Cluster_12** | **Cluster_13** | **Cluster_14** | **Cluster_15** | **Cluster_16** | **Cluster_17** | **Cluster_18** |
| **Number of values** | 1 | 3 | 4 | 6 | 9 | 27 | 15 | 32 | 27 | 51 | 40 | 64 | 45 | 35 | 29 | 20 | 13 | 16 |
|  |  |  |  |  |  |  |  |  |  |  |  |  |  |  |  |  |  |  |
| **Minimum** | -2682253.390 | -2682262.299 | -2682266.001 | -2682269.655 | -2682271.508 | -2682274.304 | -2682275.661 | -2682277.055 | -2682278.811 | -2682280.377 | -2682281.147 | -2682283.006 | -2682284.603 | -2682285.611 | -2682286.746 | -2682287.725 | -2682288.887 | -2682291.079 |
| **25% Percentile** | -2682253.390 | -2682262.299 | -2682265.871 | -2682269.159 | -2682271.340 | -2682273.983 | -2682275.575 | -2682276.471 | -2682278.546 | -2682280.025 | -2682281.106 | -2682282.530 | -2682284.338 | -2682285.490 | -2682286.531 | -2682287.326 | -2682288.685 | -2682290.420 |
| **Median** | -2682253.390 | -2682260.459 | -2682265.426 | -2682268.423 | -2682270.918 | -2682273.425 | -2682275.231 | -2682276.264 | -2682278.214 | -2682279.717 | -2682281.004 | -2682282.149 | -2682283.904 | -2682285.214 | -2682286.313 | -2682287.110 | -2682288.586 | -2682290.417 |
| **75% Percentile** | -2682253.390 | -2682259.950 | -2682265.334 | -2682267.873 | -2682270.445 | -2682272.709 | -2682274.949 | -2682276.059 | -2682277.613 | -2682279.471 | -2682280.845 | -2682281.786 | -2682283.492 | -2682285.009 | -2682286.001 | -2682286.996 | -2682288.260 | -2682289.654 |
| **Maximum** | -2682253.390 | -2682259.950 | -2682265.320 | -2682267.175 | -2682270.335 | -2682272.363 | -2682274.606 | -2682275.797 | -2682277.194 | -2682278.939 | -2682280.472 | -2682281.435 | -2682283.096 | -2682284.689 | -2682285.721 | -2682286.915 | -2682287.972 | -2682289.537 |
| **Range** | 0.000 | 2.349 | 0.681 | 2.480 | 1.173 | 1.941 | 1.055 | 1.258 | 1.617 | 1.438 | 0.675 | 1.571 | 1.507 | 0.922 | 1.025 | 0.809 | 0.915 | 1.542 |
|  |  |  |  |  |  |  |  |  |  |  |  |  |  |  |  |  |  |  |
| **95% CI of median** |  |  |  |  |  |  |  |  |  |  |  |  |  |  |  |  |  |  |
| **Actual confidence level** | 5.00% | 75.00% | 87.50% | 96.88% | 96.09% | 98.08% | 96.48% | 97.99% | 98.08% | 95.11% | 96.15% | 96.72% | 96.43% | 95.90% | 97.59% | 95.86% | 97.75% | 97.87% |
| **Lower confidence limit** |  | -2682262.299 | -2682266.001 | -2682269.655 | -2682271.465 | -2682273.966 | -2682275.575 | -2682276.309 | -2682278.537 | -2682279.812 | -2682281.105 | -2682282.271 | -2682284.314 | -2682285.371 | -2682286.520 | -2682287.272 | -2682288.685 | -2682290.420 |
| **Upper confidence limit** |  | -2682259.950 | -2682265.320 | -2682267.175 | -2682270.418 | -2682272.713 | -2682274.949 | -2682276.188 | -2682277.746 | -2682279.531 | -2682280.894 | -2682281.942 | -2682283.695 | -2682285.161 | -2682286.033 | -2682286.997 | -2682288.239 | -2682289.541 |
|  |  |  |  |  |  |  |  |  |  |  |  |  |  |  |  |  |  |  |
| **Mean** | -2682253.390 | -2682260.903 | -2682265.544 | -2682268.462 | -2682270.911 | -2682273.391 | -2682275.250 | -2682276.298 | -2682278.087 | -2682279.688 | -2682280.940 | -2682282.153 | -2682283.928 | -2682285.230 | -2682286.284 | -2682287.174 | -2682288.493 | -2682290.247 |
| **Std. Deviation** | 0.000 | 1.236 | 0.312 | 0.836 | 0.440 | 0.645 | 0.322 | 0.318 | 0.515 | 0.402 | 0.199 | 0.423 | 0.477 | 0.265 | 0.292 | 0.240 | 0.283 | 0.490 |
| **Std. Error of Mean** | 0.000 | 0.713 | 0.156 | 0.341 | 0.147 | 0.124 | 0.083 | 0.056 | 0.099 | 0.056 | 0.031 | 0.053 | 0.071 | 0.045 | 0.054 | 0.054 | 0.079 | 0.123 |
|  |  |  |  |  |  |  |  |  |  |  |  |  |  |  |  |  |  |  |
| **Lower 95% CI of mean** |  | -2682263.972 | -2682266.040 | -2682269.340 | -2682271.249 | -2682273.646 | -2682275.428 | -2682276.413 | -2682278.291 | -2682279.801 | -2682281.003 | -2682282.258 | -2682284.071 | -2682285.321 | -2682286.396 | -2682287.286 | -2682288.664 | -2682290.508 |
| **Upper 95% CI of mean** |  | -2682257.833 | -2682265.047 | -2682267.585 | -2682270.573 | -2682273.136 | -2682275.072 | -2682276.183 | -2682277.883 | -2682279.575 | -2682280.876 | -2682282.047 | -2682283.785 | -2682285.139 | -2682286.173 | -2682287.061 | -2682288.322 | -2682289.985 |
|  |  |  |  |  |  |  |  |  |  |  |  |  |  |  |  |  |  |  |
| **Test for normal distribution** |  |  |  |  |  |  |  |  |  |  |  |  |  |  |  |  |  |  |
| **Shapiro-Wilk test** |  |  |  |  |  |  |  |  |  |  |  |  |  |  |  |  |  |  |
| **W** | N too small | 0.9033 | 0.8064 | 0.9786 | 0.9272 | 0.9066 | 0.9282 | 0.9356 | 0.9107 | 0.968 | 0.8396 | 0.9682 | 0.9123 | 0.9495 | 0.954 | 0.8746 | 0.9189 | 0.8288 |
| **P value** |  | 0.3961 | 0.1141 | 0.9442 | 0.4556 | 0.019 | 0.2566 | 0.0564 | 0.0237 | 0.1816 | <0.0001 | 0.097 | 0.0023 | 0.1098 | 0.2321 | 0.0142 | 0.2424 | 0.0067 |
| **Passed normality test (alpha=0.05)?** |  | Yes | Yes | Yes | Yes | No | Yes | Yes | No | Yes | No | Yes | No | Yes | Yes | No | Yes | No |
| **P value summary** |  | ns | ns | ns | ns | * | ns | ns | * | ns | **** | ns | ** | ns | ns | * | ns | ** |

Table S. Descriptive statistics of electronic energy values with zero point energy (EE+ZPE) calculated in vacuo for each cluster.

| **Descriptive statistics of EE+ZPE (in vacuo)** |  |  |  |  |  |  |  |  |  |  |  |  |  |  |  |  |  |  |
| --- | --- | --- | --- | --- | --- | --- | --- | --- | --- | --- | --- | --- | --- | --- | --- | --- | --- | --- |
|  | **Cluster_1** | **Cluster_2** | **Cluster_3** | **Cluster_4** | **Cluster_5** | **Cluster_6** | **Cluster_7** | **Cluster_8** | **Cluster_9** | **Cluster_10** | **Cluster_11** | **Cluster_12** | **Cluster_13** | **Cluster_14** | **Cluster_15** | **Cluster_16** | **Cluster_17** | **Cluster_18** |
| **Number of values** | 1 | 3 | 4 | 6 | 9 | 27 | 15 | 32 | 27 | 51 | 40 | 64 | 45 | 35 | 29 | 20 | 13 | 16 |
|  |  |  |  |  |  |  |  |  |  |  |  |  |  |  |  |  |  |  |
| **Minimum** | -2682188.037 | -2682195.467 | -2682197.907 | -2682200.953 | -2682203.819 | -2682207.096 | -2682208.870 | -2682210.392 | -2682212.119 | -2682213.625 | -2682213.883 | -2682216.152 | -2682218.754 | -2682218.756 | -2682219.793 | -2682221.007 | -2682222.402 | -2682225.396 |
| **25% Percentile** | -2682188.037 | -2682195.467 | -2682197.863 | -2682200.939 | -2682203.290 | -2682206.174 | -2682208.266 | -2682208.500 | -2682210.452 | -2682212.104 | -2682213.363 | -2682214.875 | -2682216.898 | -2682218.119 | -2682218.899 | -2682219.829 | -2682221.834 | -2682222.878 |
| **Median** | -2682188.037 | -2682194.274 | -2682197.483 | -2682200.394 | -2682202.524 | -2682205.507 | -2682206.986 | -2682208.201 | -2682209.960 | -2682211.354 | -2682213.213 | -2682214.535 | -2682216.461 | -2682217.615 | -2682218.545 | -2682219.539 | -2682220.950 | -2682222.877 |
| **75% Percentile** | -2682188.037 | -2682193.015 | -2682196.242 | -2682199.912 | -2682202.151 | -2682204.892 | -2682206.853 | -2682207.702 | -2682209.222 | -2682211.064 | -2682212.628 | -2682214.026 | -2682215.829 | -2682217.364 | -2682218.060 | -2682219.203 | -2682220.211 | -2682222.130 |
| **Maximum** | -2682188.037 | -2682193.015 | -2682195.911 | -2682199.747 | -2682201.912 | -2682203.443 | -2682206.334 | -2682207.208 | -2682207.997 | -2682209.964 | -2682210.910 | -2682212.980 | -2682215.049 | -2682216.442 | -2682217.443 | -2682219.202 | -2682220.131 | -2682222.005 |
| **Range** | 0.000 | 2.452 | 1.995 | 1.205 | 1.907 | 3.653 | 2.536 | 3.185 | 4.121 | 3.662 | 2.973 | 3.171 | 3.705 | 2.314 | 2.349 | 1.805 | 2.271 | 3.390 |
|  |  |  |  |  |  |  |  |  |  |  |  |  |  |  |  |  |  |  |
| **95% CI of median** |  |  |  |  |  |  |  |  |  |  |  |  |  |  |  |  |  |  |
| **Actual confidence level** | 5.00% | 75.00% | 87.50% | 96.88% | 96.09% | 98.08% | 96.48% | 97.99% | 98.08% | 95.11% | 96.15% | 96.72% | 96.43% | 95.90% | 97.59% | 95.86% | 97.75% | 97.87% |
| **Lower confidence limit** |  | -2682195.467 | -2682197.907 | -2682200.953 | -2682203.742 | -2682206.109 | -2682208.266 | -2682208.499 | -2682210.416 | -2682211.828 | -2682213.213 | -2682214.732 | -2682216.757 | -2682217.851 | -2682218.896 | -2682219.776 | -2682221.846 | -2682222.878 |
| **Upper confidence limit** |  | -2682193.015 | -2682195.911 | -2682199.747 | -2682202.096 | -2682205.070 | -2682206.853 | -2682207.832 | -2682209.310 | -2682211.307 | -2682213.053 | -2682214.348 | -2682215.941 | -2682217.526 | -2682218.287 | -2682219.203 | -2682220.211 | -2682222.006 |
|  |  |  |  |  |  |  |  |  |  |  |  |  |  |  |  |  |  |  |
| **Mean** | -2682188.037 | -2682194.252 | -2682197.196 | -2682200.398 | -2682202.696 | -2682205.438 | -2682207.368 | -2682208.210 | -2682209.882 | -2682211.562 | -2682212.963 | -2682214.487 | -2682216.408 | -2682217.766 | -2682218.557 | -2682219.612 | -2682221.133 | -2682222.821 |
| **Std. Deviation** | 0.000 | 1.226 | 0.902 | 0.510 | 0.686 | 0.833 | 0.838 | 0.637 | 0.896 | 0.754 | 0.640 | 0.750 | 0.803 | 0.541 | 0.655 | 0.444 | 0.796 | 0.806 |
| **Std. Error of Mean** | 0.000 | 0.708 | 0.451 | 0.208 | 0.229 | 0.160 | 0.216 | 0.113 | 0.173 | 0.106 | 0.101 | 0.094 | 0.120 | 0.092 | 0.122 | 0.099 | 0.221 | 0.201 |
|  |  |  |  |  |  |  |  |  |  |  |  |  |  |  |  |  |  |  |
| **Lower 95% CI of mean** |  | -2682197.297 | -2682198.632 | -2682200.933 | -2682203.224 | -2682205.767 | -2682207.832 | -2682208.439 | -2682210.237 | -2682211.774 | -2682213.168 | -2682214.675 | -2682216.649 | -2682217.952 | -2682218.806 | -2682219.820 | -2682221.614 | -2682223.250 |
| **Upper 95% CI of mean** |  | -2682191.206 | -2682195.760 | -2682199.863 | -2682202.169 | -2682205.108 | -2682206.904 | -2682207.980 | -2682209.527 | -2682211.350 | -2682212.758 | -2682214.300 | -2682216.167 | -2682217.580 | -2682218.308 | -2682219.404 | -2682220.652 | -2682222.392 |
|  |  |  |  |  |  |  |  |  |  |  |  |  |  |  |  |  |  |  |
| **Test for normal distribution** |  |  |  |  |  |  |  |  |  |  |  |  |  |  |  |  |  |  |
| **Shapiro-Wilk test** |  |  |  |  |  |  |  |  |  |  |  |  |  |  |  |  |  |  |
| **W** | N too small | 0.9998 | 0.8652 | 0.9064 | 0.8858 | 0.9806 | 0.8462 | 0.8882 | 0.9849 | 0.9875 | 0.8671 | 0.9738 | 0.9601 | 0.9424 | 0.9565 | 0.8299 | 0.8871 | 0.7053 |
| **P value** |  | 0.9704 | 0.2791 | 0.4129 | 0.1804 | 0.8756 | 0.0153 | 0.0032 | 0.9522 | 0.8636 | 0.0002 | 0.1906 | 0.1234 | 0.0664 | 0.2689 | 0.0025 | 0.0891 | 0.0002 |
| **Passed normality test (alpha=0.05)?** |  | Yes | Yes | Yes | Yes | Yes | No | No | Yes | Yes | No | Yes | Yes | Yes | Yes | No | Yes | No |
| **P value summary** |  | ns | ns | ns | ns | ns | * | ** | ns | ns | *** | ns | ns | ns | ns | ** | ns | *** |

Table . Details of ANOVA analysis performed for PCM approach.

| Table Analyzed | G values (PCM) |  |  |  |  |
| --- | --- | --- | --- | --- | --- |
| Data sets analyzed | Cluster_4-Cluster_17 | |  |  |  |
| Distribution assumption | Normal (Gaussian) | |  |  |  |
|  |  |  |  |  |  |
| Brown-Forsythe ANOVA test |  |  |  |  |  |
| F* (DFn | DFd) |  |  |  |  |
| P value | <0.0001 |  |  |  |  |
| P value summary | **** |  |  |  |  |
| Significant diff. among means (P < 0.05)? | Yes |  |  |  |  |
|  |  |  |  |  |  |
| Welch's ANOVA test |  |  |  |  |  |
| W (DFn | DFd) |  |  |  |  |
| P value | <0.0001 |  |  |  |  |
| P value summary | **** |  |  |  |  |
| Significant diff. among means (P < 0.05)? | Yes |  |  |  |  |
|  |  |  |  |  |  |
| Data summary |  |  |  |  |  |
| Number of values (total) | 434 |  |  |  |  |
|  |  |  |  |  |  |
| Number of comparisons per family | 91 |  |  |  |  |
| Alpha | 0.05 |  |  |  |  |
|  |  |  |  |  |  |
| Dunnett's T3 multiple comparisons test | Mean diff. | 95.00% CI of diff. | Below threshold? | Summary | Adjusted P Value |
| Cluster_4 vs. Cluster_5 | 3.823 | -2.026 to 9.672 | No | ns | 0.1541 |
| Cluster_4 vs. Cluster_6 | 5.379 | -0.5206 to 11.28 | No | ns | 0.0645 |
| Cluster_4 vs. Cluster_7 | 7.108 | 1.244 to 12.97 | Yes | * | 0.0291 |
| Cluster_4 vs. Cluster_8 | 8.599 | 2.758 to 14.44 | Yes | * | 0.0167 |
| Cluster_4 vs. Cluster_9 | 9.61 | 3.761 to 15.46 | Yes | * | 0.0121 |
| Cluster_4 vs. Cluster_10 | 10.45 | 4.621 to 16.29 | Yes | ** | 0.0094 |
| Cluster_4 vs. Cluster_11 | 11.42 | 5.585 to 17.26 | Yes | ** | 0.0073 |
| Cluster_4 vs. Cluster_12 | 12.84 | 6.993 to 18.68 | Yes | ** | 0.0052 |
| Cluster_4 vs. Cluster_13 | 13.97 | 8.143 to 19.81 | Yes | ** | 0.004 |
| Cluster_4 vs. Cluster_14 | 14.77 | 8.939 to 20.61 | Yes | ** | 0.0034 |
| Cluster_4 vs. Cluster_15 | 15.73 | 9.890 to 21.57 | Yes | ** | 0.0028 |
| Cluster_4 vs. Cluster_16 | 16.63 | 10.80 to 22.47 | Yes | ** | 0.0024 |
| Cluster_4 vs. Cluster_17 | 17.95 | 12.07 to 23.82 | Yes | ** | 0.0019 |
| Cluster_5 vs. Cluster_6 | 1.556 | 1.063 to 2.049 | Yes | **** | <0.0001 |
| Cluster_5 vs. Cluster_7 | 3.285 | 2.910 to 3.660 | Yes | **** | <0.0001 |
| Cluster_5 vs. Cluster_8 | 4.776 | 4.481 to 5.071 | Yes | **** | <0.0001 |
| Cluster_5 vs. Cluster_9 | 5.787 | 5.457 to 6.117 | Yes | **** | <0.0001 |
| Cluster_5 vs. Cluster_10 | 6.63 | 6.364 to 6.897 | Yes | **** | <0.0001 |
| Cluster_5 vs. Cluster_11 | 7.598 | 7.318 to 7.878 | Yes | **** | <0.0001 |
| Cluster_5 vs. Cluster_12 | 9.014 | 8.708 to 9.320 | Yes | **** | <0.0001 |
| Cluster_5 vs. Cluster_13 | 10.15 | 9.886 to 10.42 | Yes | **** | <0.0001 |
| Cluster_5 vs. Cluster_14 | 10.95 | 10.67 to 11.23 | Yes | **** | <0.0001 |
| Cluster_5 vs. Cluster_15 | 11.91 | 11.62 to 12.19 | Yes | **** | <0.0001 |
| Cluster_5 vs. Cluster_16 | 12.81 | 12.53 to 13.09 | Yes | **** | <0.0001 |
| Cluster_5 vs. Cluster_17 | 14.12 | 13.72 to 14.53 | Yes | **** | <0.0001 |
| Cluster_6 vs. Cluster_7 | 1.729 | 1.209 to 2.248 | Yes | **** | <0.0001 |
| Cluster_6 vs. Cluster_8 | 3.22 | 2.746 to 3.693 | Yes | **** | <0.0001 |
| Cluster_6 vs. Cluster_9 | 4.231 | 3.739 to 4.723 | Yes | **** | <0.0001 |
| Cluster_6 vs. Cluster_10 | 5.074 | 4.614 to 5.534 | Yes | **** | <0.0001 |
| Cluster_6 vs. Cluster_11 | 6.042 | 5.576 to 6.508 | Yes | **** | <0.0001 |
| Cluster_6 vs. Cluster_12 | 7.458 | 6.977 to 7.939 | Yes | **** | <0.0001 |
| Cluster_6 vs. Cluster_13 | 8.595 | 8.137 to 9.054 | Yes | **** | <0.0001 |
| Cluster_6 vs. Cluster_14 | 9.396 | 8.930 to 9.861 | Yes | **** | <0.0001 |
| Cluster_6 vs. Cluster_15 | 10.35 | 9.879 to 10.82 | Yes | **** | <0.0001 |
| Cluster_6 vs. Cluster_16 | 11.25 | 10.79 to 11.72 | Yes | **** | <0.0001 |
| Cluster_6 vs. Cluster_17 | 12.57 | 12.03 to 13.10 | Yes | **** | <0.0001 |
| Cluster_7 vs. Cluster_8 | 1.491 | 1.146 to 1.836 | Yes | **** | <0.0001 |
| Cluster_7 vs. Cluster_9 | 2.502 | 2.128 to 2.877 | Yes | **** | <0.0001 |
| Cluster_7 vs. Cluster_10 | 3.345 | 3.025 to 3.666 | Yes | **** | <0.0001 |
| Cluster_7 vs. Cluster_11 | 4.313 | 3.980 to 4.647 | Yes | **** | <0.0001 |
| Cluster_7 vs. Cluster_12 | 5.729 | 5.374 to 6.085 | Yes | **** | <0.0001 |
| Cluster_7 vs. Cluster_13 | 6.867 | 6.547 to 7.187 | Yes | **** | <0.0001 |
| Cluster_7 vs. Cluster_14 | 7.667 | 7.336 to 7.999 | Yes | **** | <0.0001 |
| Cluster_7 vs. Cluster_15 | 8.621 | 8.282 to 8.959 | Yes | **** | <0.0001 |
| Cluster_7 vs. Cluster_16 | 9.525 | 9.196 to 9.855 | Yes | **** | <0.0001 |
| Cluster_7 vs. Cluster_17 | 10.84 | 10.40 to 11.28 | Yes | **** | <0.0001 |
| Cluster_8 vs. Cluster_9 | 1.011 | 0.7178 to 1.305 | Yes | **** | <0.0001 |
| Cluster_8 vs. Cluster_10 | 1.854 | 1.646 to 2.063 | Yes | **** | <0.0001 |
| Cluster_8 vs. Cluster_11 | 2.822 | 2.594 to 3.051 | Yes | **** | <0.0001 |
| Cluster_8 vs. Cluster_12 | 4.238 | 3.976 to 4.501 | Yes | **** | <0.0001 |
| Cluster_8 vs. Cluster_13 | 5.376 | 5.169 to 5.583 | Yes | **** | <0.0001 |
| Cluster_8 vs. Cluster_14 | 6.176 | 5.950 to 6.403 | Yes | **** | <0.0001 |
| Cluster_8 vs. Cluster_15 | 7.13 | 6.893 to 7.367 | Yes | **** | <0.0001 |
| Cluster_8 vs. Cluster_16 | 8.034 | 7.811 to 8.258 | Yes | **** | <0.0001 |
| Cluster_8 vs. Cluster_17 | 9.347 | 8.969 to 9.724 | Yes | **** | <0.0001 |
| Cluster_9 vs. Cluster_10 | 0.8429 | 0.5780 to 1.108 | Yes | **** | <0.0001 |
| Cluster_9 vs. Cluster_11 | 1.811 | 1.533 to 2.089 | Yes | **** | <0.0001 |
| Cluster_9 vs. Cluster_12 | 3.227 | 2.922 to 3.531 | Yes | **** | <0.0001 |
| Cluster_9 vs. Cluster_13 | 4.364 | 4.101 to 4.628 | Yes | **** | <0.0001 |
| Cluster_9 vs. Cluster_14 | 5.165 | 4.888 to 5.441 | Yes | **** | <0.0001 |
| Cluster_9 vs. Cluster_15 | 6.119 | 5.834 to 6.403 | Yes | **** | <0.0001 |
| Cluster_9 vs. Cluster_16 | 7.023 | 6.747 to 7.298 | Yes | **** | <0.0001 |
| Cluster_9 vs. Cluster_17 | 8.335 | 7.933 to 8.737 | Yes | **** | <0.0001 |
| Cluster_10 vs. Cluster_11 | 0.9681 | 0.7878 to 1.148 | Yes | **** | <0.0001 |
| Cluster_10 vs. Cluster_12 | 2.384 | 2.159 to 2.608 | Yes | **** | <0.0001 |
| Cluster_10 vs. Cluster_13 | 3.521 | 3.371 to 3.672 | Yes | **** | <0.0001 |
| Cluster_10 vs. Cluster_14 | 4.322 | 4.143 to 4.501 | Yes | **** | <0.0001 |
| Cluster_10 vs. Cluster_15 | 5.276 | 5.083 to 5.468 | Yes | **** | <0.0001 |
| Cluster_10 vs. Cluster_16 | 6.18 | 6.004 to 6.356 | Yes | **** | <0.0001 |
| Cluster_10 vs. Cluster_17 | 7.492 | 7.136 to 7.849 | Yes | **** | <0.0001 |
| Cluster_11 vs. Cluster_12 | 1.416 | 1.173 to 1.659 | Yes | **** | <0.0001 |
| Cluster_11 vs. Cluster_13 | 2.553 | 2.375 to 2.731 | Yes | **** | <0.0001 |
| Cluster_11 vs. Cluster_14 | 3.354 | 3.152 to 3.556 | Yes | **** | <0.0001 |
| Cluster_11 vs. Cluster_15 | 4.308 | 4.093 to 4.522 | Yes | **** | <0.0001 |
| Cluster_11 vs. Cluster_16 | 5.212 | 5.013 to 5.411 | Yes | **** | <0.0001 |
| Cluster_11 vs. Cluster_17 | 6.524 | 6.157 to 6.891 | Yes | **** | <0.0001 |
| Cluster_12 vs. Cluster_13 | 1.138 | 0.9149 to 1.360 | Yes | **** | <0.0001 |
| Cluster_12 vs. Cluster_14 | 1.938 | 1.697 to 2.179 | Yes | **** | <0.0001 |
| Cluster_12 vs. Cluster_15 | 2.892 | 2.640 to 3.143 | Yes | **** | <0.0001 |
| Cluster_12 vs. Cluster_16 | 3.796 | 3.557 to 4.035 | Yes | **** | <0.0001 |
| Cluster_12 vs. Cluster_17 | 5.108 | 4.722 to 5.494 | Yes | **** | <0.0001 |
| Cluster_13 vs. Cluster_14 | 0.8005 | 0.6237 to 0.9772 | Yes | **** | <0.0001 |
| Cluster_13 vs. Cluster_15 | 1.754 | 1.564 to 1.945 | Yes | **** | <0.0001 |
| Cluster_13 vs. Cluster_16 | 2.659 | 2.485 to 2.832 | Yes | **** | <0.0001 |
| Cluster_13 vs. Cluster_17 | 3.971 | 3.616 to 4.326 | Yes | **** | <0.0001 |
| Cluster_14 vs. Cluster_15 | 0.9537 | 0.7415 to 1.166 | Yes | **** | <0.0001 |
| Cluster_14 vs. Cluster_16 | 1.858 | 1.661 to 2.055 | Yes | **** | <0.0001 |
| Cluster_14 vs. Cluster_17 | 3.17 | 2.805 to 3.535 | Yes | **** | <0.0001 |
| Cluster_15 vs. Cluster_16 | 0.9044 | 0.6949 to 1.114 | Yes | **** | <0.0001 |
| Cluster_15 vs. Cluster_17 | 2.217 | 1.846 to 2.588 | Yes | **** | <0.0001 |
| Cluster_16 vs. Cluster_17 | 1.312 | 0.9487 to 1.676 | Yes | **** | <0.0001 |

Table S.Details of ANOVA analysis performed for in vacuo approach.

| Table Analyzed | G values (in_vacuo) | |  |  |  |
| --- | --- | --- | --- | --- | --- |
| Data sets analyzed | Cluster_2-Cluster_18 | | |  |  |
| Distribution assumption | Normal (Gaussian) | |  |  |  |
|  |  |  |  |  |  |
| Brown-Forsythe ANOVA test |  |  |  |  |  |
| F* (DFn, DFd) | 2720 (16.00, 15.05) | |  |  |  |
| P value | <0.0001 |  |  |  |  |
| P value summary | **** |  |  |  |  |
| Significant diff. among means (P < 0.05)? | Yes |  |  |  |  |
|  |  |  |  |  |  |
| Welch's ANOVA test |  |  |  |  |  |
| W (DFn, DFd) | 4183 (16.00, 59.35) | |  |  |  |
| P value | <0.0001 |  |  |  |  |
| P value summary | **** |  |  |  |  |
| Significant diff. among means (P < 0.05)? | Yes |  |  |  |  |
|  |  |  |  |  |  |
| Data summary |  |  |  |  |  |
| Number of values (total) | 436 |  |  |  |  |
| Number of families | 1 |  |  |  |  |
| Number of comparisons per family | 136 |  |  |  |  |
| Alpha | 0.05 |  |  |  |  |
|  |  |  |  |  |  |
| Dunnett's T3 multiple comparisons test | Mean diff. | 95.00% CI of diff. | Below threshold? | Summary | Adjusted P Value |
| Cluster_2 vs. Cluster_3 | 4.641 | -4.615 to 13.90 | No | ns | 0.1836 |
| Cluster_2 vs. Cluster_4 | 7.56 | 0.8849 to 14.23 | Yes | * | 0.0353 |
| Cluster_2 vs. Cluster_5 | 10.01 | 0.7769 to 19.24 | Yes | * | 0.0427 |
| Cluster_2 vs. Cluster_6 | 12.49 | 3.310 to 21.67 | Yes | * | 0.0274 |
| Cluster_2 vs. Cluster_7 | 14.35 | 5.244 to 23.45 | Yes | * | 0.0205 |
| Cluster_2 vs. Cluster_8 | 15.4 | 6.325 to 24.47 | Yes | * | 0.0177 |
| Cluster_2 vs. Cluster_9 | 17.18 | 8.056 to 26.31 | Yes | * | 0.0144 |
| Cluster_2 vs. Cluster_10 | 18.79 | 9.715 to 27.86 | Yes | * | 0.0119 |
| Cluster_2 vs. Cluster_11 | 20.04 | 10.99 to 29.09 | Yes | * | 0.0104 |
| Cluster_2 vs. Cluster_12 | 21.25 | 12.18 to 30.32 | Yes | ** | 0.0093 |
| Cluster_2 vs. Cluster_13 | 23.03 | 13.94 to 32.11 | Yes | ** | 0.008 |
| Cluster_2 vs. Cluster_14 | 24.33 | 15.27 to 33.39 | Yes | ** | 0.0071 |
| Cluster_2 vs. Cluster_15 | 25.38 | 16.31 to 34.45 | Yes | ** | 0.0065 |
| Cluster_2 vs. Cluster_16 | 26.27 | 17.20 to 35.34 | Yes | ** | 0.0061 |
| Cluster_2 vs. Cluster_17 | 27.59 | 18.49 to 36.69 | Yes | ** | 0.0056 |
| Cluster_2 vs. Cluster_18 | 29.34 | 20.17 to 38.52 | Yes | ** | 0.005 |
| Cluster_3 vs. Cluster_4 | 2.919 | 0.9307 to 4.907 | Yes | ** | 0.0057 |
| Cluster_3 vs. Cluster_5 | 5.367 | 4.283 to 6.452 | Yes | **** | <0.0001 |
| Cluster_3 vs. Cluster_6 | 7.847 | 6.838 to 8.857 | Yes | **** | <0.0001 |
| Cluster_3 vs. Cluster_7 | 9.706 | 8.627 to 10.79 | Yes | **** | <0.0001 |
| Cluster_3 vs. Cluster_8 | 10.75 | 9.610 to 11.90 | Yes | **** | <0.0001 |
| Cluster_3 vs. Cluster_9 | 12.54 | 11.50 to 13.58 | Yes | **** | <0.0001 |
| Cluster_3 vs. Cluster_10 | 14.14 | 13.00 to 15.29 | Yes | **** | <0.0001 |
| Cluster_3 vs. Cluster_11 | 15.4 | 14.05 to 16.74 | Yes | **** | <0.0001 |
| Cluster_3 vs. Cluster_12 | 16.61 | 15.47 to 17.75 | Yes | **** | <0.0001 |
| Cluster_3 vs. Cluster_13 | 18.38 | 17.20 to 19.57 | Yes | **** | <0.0001 |
| Cluster_3 vs. Cluster_14 | 19.69 | 18.57 to 20.81 | Yes | **** | <0.0001 |
| Cluster_3 vs. Cluster_15 | 20.74 | 19.60 to 21.88 | Yes | **** | <0.0001 |
| Cluster_3 vs. Cluster_16 | 21.63 | 20.49 to 22.77 | Yes | **** | <0.0001 |
| Cluster_3 vs. Cluster_17 | 22.95 | 21.88 to 24.02 | Yes | **** | <0.0001 |
| Cluster_3 vs. Cluster_18 | 24.7 | 23.65 to 25.75 | Yes | **** | <0.0001 |
| Cluster_4 vs. Cluster_5 | 2.449 | 0.4803 to 4.417 | Yes | * | 0.0152 |
| Cluster_4 vs. Cluster_6 | 4.928 | 2.886 to 6.970 | Yes | *** | 0.0005 |
| Cluster_4 vs. Cluster_7 | 6.788 | 4.812 to 8.763 | Yes | **** | <0.0001 |
| Cluster_4 vs. Cluster_8 | 7.836 | 5.724 to 9.948 | Yes | *** | 0.0001 |
| Cluster_4 vs. Cluster_9 | 9.625 | 7.626 to 11.62 | Yes | **** | <0.0001 |
| Cluster_4 vs. Cluster_10 | 11.23 | 9.114 to 13.34 | Yes | **** | <0.0001 |
| Cluster_4 vs. Cluster_11 | 12.48 | 10.38 to 14.57 | Yes | **** | <0.0001 |
| Cluster_4 vs. Cluster_12 | 13.69 | 11.58 to 15.80 | Yes | **** | <0.0001 |
| Cluster_4 vs. Cluster_13 | 15.47 | 13.34 to 17.59 | Yes | **** | <0.0001 |
| Cluster_4 vs. Cluster_14 | 16.77 | 14.67 to 18.87 | Yes | **** | <0.0001 |
| Cluster_4 vs. Cluster_15 | 17.82 | 15.71 to 19.93 | Yes | **** | <0.0001 |
| Cluster_4 vs. Cluster_16 | 18.71 | 16.60 to 20.82 | Yes | **** | <0.0001 |
| Cluster_4 vs. Cluster_17 | 20.03 | 18.06 to 22.00 | Yes | **** | <0.0001 |
| Cluster_4 vs. Cluster_18 | 21.78 | 19.74 to 23.82 | Yes | **** | <0.0001 |
| Cluster_5 vs. Cluster_6 | 2.48 | 1.684 to 3.275 | Yes | **** | <0.0001 |
| Cluster_5 vs. Cluster_7 | 4.339 | 3.586 to 5.092 | Yes | **** | <0.0001 |
| Cluster_5 vs. Cluster_8 | 5.387 | 4.641 to 6.133 | Yes | **** | <0.0001 |
| Cluster_5 vs. Cluster_9 | 7.176 | 6.417 to 7.936 | Yes | **** | <0.0001 |
| Cluster_5 vs. Cluster_10 | 8.777 | 8.031 to 9.523 | Yes | **** | <0.0001 |
| Cluster_5 vs. Cluster_11 | 10.03 | 9.295 to 10.76 | Yes | **** | <0.0001 |
| Cluster_5 vs. Cluster_12 | 11.24 | 10.50 to 11.98 | Yes | **** | <0.0001 |
| Cluster_5 vs. Cluster_13 | 13.02 | 12.28 to 13.76 | Yes | **** | <0.0001 |
| Cluster_5 vs. Cluster_14 | 14.32 | 13.59 to 15.05 | Yes | **** | <0.0001 |
| Cluster_5 vs. Cluster_15 | 15.37 | 14.63 to 16.12 | Yes | **** | <0.0001 |
| Cluster_5 vs. Cluster_16 | 16.26 | 15.52 to 17.00 | Yes | **** | <0.0001 |
| Cluster_5 vs. Cluster_17 | 17.58 | 16.84 to 18.33 | Yes | **** | <0.0001 |
| Cluster_5 vs. Cluster_18 | 19.34 | 18.53 to 20.14 | Yes | **** | <0.0001 |
| Cluster_6 vs. Cluster_7 | 1.859 | 1.285 to 2.434 | Yes | **** | <0.0001 |
| Cluster_6 vs. Cluster_8 | 2.907 | 2.379 to 3.436 | Yes | **** | <0.0001 |
| Cluster_6 vs. Cluster_9 | 4.696 | 4.095 to 5.298 | Yes | **** | <0.0001 |
| Cluster_6 vs. Cluster_10 | 6.297 | 5.770 to 6.825 | Yes | **** | <0.0001 |
| Cluster_6 vs. Cluster_11 | 7.549 | 7.042 to 8.056 | Yes | **** | <0.0001 |
| Cluster_6 vs. Cluster_12 | 8.762 | 8.239 to 9.285 | Yes | **** | <0.0001 |
| Cluster_6 vs. Cluster_13 | 10.54 | 9.990 to 11.08 | Yes | **** | <0.0001 |
| Cluster_6 vs. Cluster_14 | 11.84 | 11.32 to 12.36 | Yes | **** | <0.0001 |
| Cluster_6 vs. Cluster_15 | 12.89 | 12.37 to 13.42 | Yes | **** | <0.0001 |
| Cluster_6 vs. Cluster_16 | 13.78 | 13.26 to 14.31 | Yes | **** | <0.0001 |
| Cluster_6 vs. Cluster_17 | 15.1 | 14.54 to 15.67 | Yes | **** | <0.0001 |
| Cluster_6 vs. Cluster_18 | 16.86 | 16.18 to 17.53 | Yes | **** | <0.0001 |
| Cluster_7 vs. Cluster_8 | 1.048 | 0.6478 to 1.448 | Yes | **** | <0.0001 |
| Cluster_7 vs. Cluster_9 | 2.837 | 2.339 to 3.336 | Yes | **** | <0.0001 |
| Cluster_7 vs. Cluster_10 | 4.438 | 4.039 to 4.837 | Yes | **** | <0.0001 |
| Cluster_7 vs. Cluster_11 | 5.69 | 5.316 to 6.063 | Yes | **** | <0.0001 |
| Cluster_7 vs. Cluster_12 | 6.903 | 6.510 to 7.296 | Yes | **** | <0.0001 |
| Cluster_7 vs. Cluster_13 | 8.678 | 8.254 to 9.102 | Yes | **** | <0.0001 |
| Cluster_7 vs. Cluster_14 | 9.98 | 9.596 to 10.36 | Yes | **** | <0.0001 |
| Cluster_7 vs. Cluster_15 | 11.03 | 10.64 to 11.43 | Yes | **** | <0.0001 |
| Cluster_7 vs. Cluster_16 | 11.92 | 11.53 to 12.32 | Yes | **** | <0.0001 |
| Cluster_7 vs. Cluster_17 | 13.24 | 12.79 to 13.70 | Yes | **** | <0.0001 |
| Cluster_7 vs. Cluster_18 | 15 | 14.40 to 15.59 | Yes | **** | <0.0001 |
| Cluster_8 vs. Cluster_9 | 1.789 | 1.353 to 2.226 | Yes | **** | <0.0001 |
| Cluster_8 vs. Cluster_10 | 3.39 | 3.095 to 3.685 | Yes | **** | <0.0001 |
| Cluster_8 vs. Cluster_11 | 4.642 | 4.398 to 4.886 | Yes | **** | <0.0001 |
| Cluster_8 vs. Cluster_12 | 5.855 | 5.569 to 6.140 | Yes | **** | <0.0001 |
| Cluster_8 vs. Cluster_13 | 7.63 | 7.294 to 7.966 | Yes | **** | <0.0001 |
| Cluster_8 vs. Cluster_14 | 8.932 | 8.663 to 9.201 | Yes | **** | <0.0001 |
| Cluster_8 vs. Cluster_15 | 9.986 | 9.693 to 10.28 | Yes | **** | <0.0001 |
| Cluster_8 vs. Cluster_16 | 10.88 | 10.58 to 11.17 | Yes | **** | <0.0001 |
| Cluster_8 vs. Cluster_17 | 12.2 | 11.81 to 12.58 | Yes | **** | <0.0001 |
| Cluster_8 vs. Cluster_18 | 13.95 | 13.40 to 14.50 | Yes | **** | <0.0001 |
| Cluster_9 vs. Cluster_10 | 1.601 | 1.165 to 2.037 | Yes | **** | <0.0001 |
| Cluster_9 vs. Cluster_11 | 2.852 | 2.444 to 3.261 | Yes | **** | <0.0001 |
| Cluster_9 vs. Cluster_12 | 4.066 | 3.635 to 4.496 | Yes | **** | <0.0001 |
| Cluster_9 vs. Cluster_13 | 5.841 | 5.380 to 6.302 | Yes | **** | <0.0001 |
| Cluster_9 vs. Cluster_14 | 7.143 | 6.722 to 7.564 | Yes | **** | <0.0001 |
| Cluster_9 vs. Cluster_15 | 8.197 | 7.763 to 8.631 | Yes | **** | <0.0001 |
| Cluster_9 vs. Cluster_16 | 9.087 | 8.652 to 9.521 | Yes | **** | <0.0001 |
| Cluster_9 vs. Cluster_17 | 10.41 | 9.917 to 10.90 | Yes | **** | <0.0001 |
| Cluster_9 vs. Cluster_18 | 12.16 | 11.54 to 12.78 | Yes | **** | <0.0001 |
| Cluster_10 vs. Cluster_11 | 1.251 | 1.013 to 1.490 | Yes | **** | <0.0001 |
| Cluster_10 vs. Cluster_12 | 2.465 | 2.182 to 2.747 | Yes | **** | <0.0001 |
| Cluster_10 vs. Cluster_13 | 4.24 | 3.906 to 4.574 | Yes | **** | <0.0001 |
| Cluster_10 vs. Cluster_14 | 5.542 | 5.276 to 5.808 | Yes | **** | <0.0001 |
| Cluster_10 vs. Cluster_15 | 6.596 | 6.306 to 6.887 | Yes | **** | <0.0001 |
| Cluster_10 vs. Cluster_16 | 7.486 | 7.193 to 7.778 | Yes | **** | <0.0001 |
| Cluster_10 vs. Cluster_17 | 8.805 | 8.418 to 9.192 | Yes | **** | <0.0001 |
| Cluster_10 vs. Cluster_18 | 10.56 | 10.01 to 11.11 | Yes | **** | <0.0001 |
| Cluster_11 vs. Cluster_12 | 1.213 | 0.9871 to 1.439 | Yes | **** | <0.0001 |
| Cluster_11 vs. Cluster_13 | 2.989 | 2.697 to 3.280 | Yes | **** | <0.0001 |
| Cluster_11 vs. Cluster_14 | 4.291 | 4.086 to 4.496 | Yes | **** | <0.0001 |
| Cluster_11 vs. Cluster_15 | 5.345 | 5.106 to 5.584 | Yes | **** | <0.0001 |
| Cluster_11 vs. Cluster_16 | 6.234 | 5.991 to 6.478 | Yes | **** | <0.0001 |
| Cluster_11 vs. Cluster_17 | 7.554 | 7.191 to 7.917 | Yes | **** | <0.0001 |
| Cluster_11 vs. Cluster_18 | 9.307 | 8.770 to 9.844 | Yes | **** | <0.0001 |
| Cluster_12 vs. Cluster_13 | 1.775 | 1.449 to 2.102 | Yes | **** | <0.0001 |
| Cluster_12 vs. Cluster_14 | 3.077 | 2.822 to 3.332 | Yes | **** | <0.0001 |
| Cluster_12 vs. Cluster_15 | 4.132 | 3.851 to 4.413 | Yes | **** | <0.0001 |
| Cluster_12 vs. Cluster_16 | 5.021 | 4.738 to 5.304 | Yes | **** | <0.0001 |
| Cluster_12 vs. Cluster_17 | 6.341 | 5.958 to 6.723 | Yes | **** | <0.0001 |
| Cluster_12 vs. Cluster_18 | 8.094 | 7.545 to 8.643 | Yes | **** | <0.0001 |
| Cluster_13 vs. Cluster_14 | 1.302 | 0.9894 to 1.615 | Yes | **** | <0.0001 |
| Cluster_13 vs. Cluster_15 | 2.356 | 2.024 to 2.689 | Yes | **** | <0.0001 |
| Cluster_13 vs. Cluster_16 | 3.246 | 2.912 to 3.579 | Yes | **** | <0.0001 |
| Cluster_13 vs. Cluster_17 | 4.565 | 4.152 to 4.978 | Yes | **** | <0.0001 |
| Cluster_13 vs. Cluster_18 | 6.318 | 5.751 to 6.886 | Yes | **** | <0.0001 |
| Cluster_14 vs. Cluster_15 | 1.054 | 0.7894 to 1.319 | Yes | **** | <0.0001 |
| Cluster_14 vs. Cluster_16 | 1.944 | 1.676 to 2.211 | Yes | **** | <0.0001 |
| Cluster_14 vs. Cluster_17 | 3.263 | 2.889 to 3.638 | Yes | **** | <0.0001 |
| Cluster_14 vs. Cluster_18 | 5.017 | 4.472 to 5.561 | Yes | **** | <0.0001 |
| Cluster_15 vs. Cluster_16 | 0.8894 | 0.5988 to 1.180 | Yes | **** | <0.0001 |
| Cluster_15 vs. Cluster_17 | 2.209 | 1.823 to 2.595 | Yes | **** | <0.0001 |
| Cluster_15 vs. Cluster_18 | 3.962 | 3.411 to 4.514 | Yes | **** | <0.0001 |
| Cluster_16 vs. Cluster_17 | 1.32 | 0.9333 to 1.706 | Yes | **** | <0.0001 |
| Cluster_16 vs. Cluster_18 | 3.073 | 2.523 to 3.623 | Yes | **** | <0.0001 |
| Cluster_17 vs. Cluster_18 | 1.753 | 1.168 to 2.339 | Yes | **** | <0.0001 |


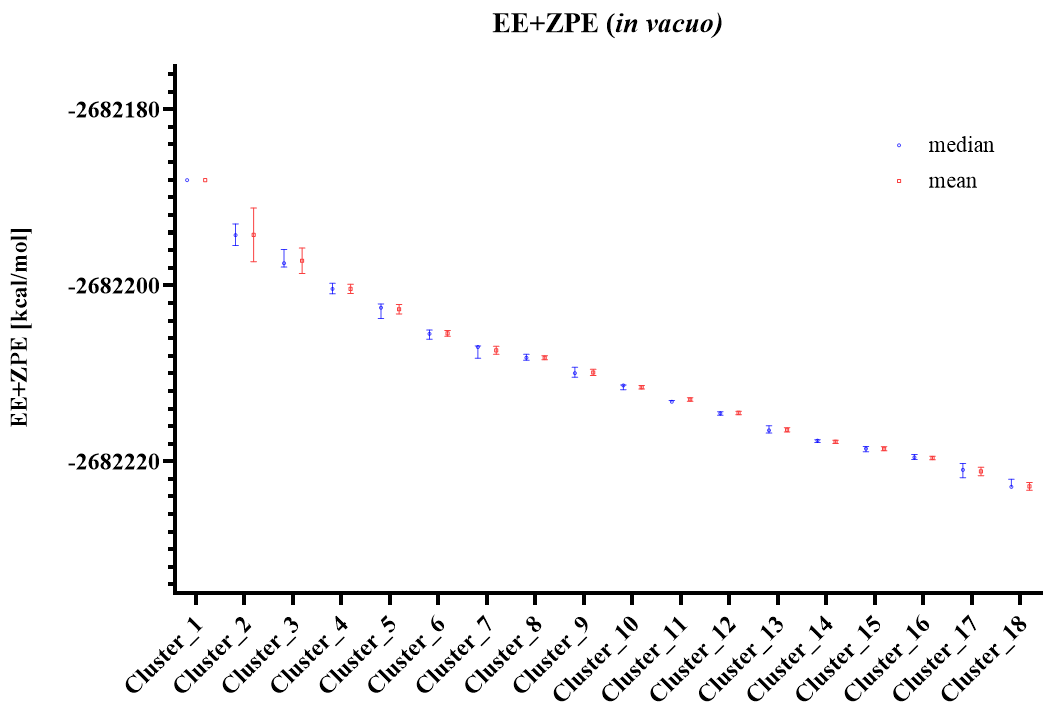


Figure S. Mean (red) and median (blue) of EE+ZPE values calculated using in vacuo approach for each cluster. The error bars represent 95% CI.


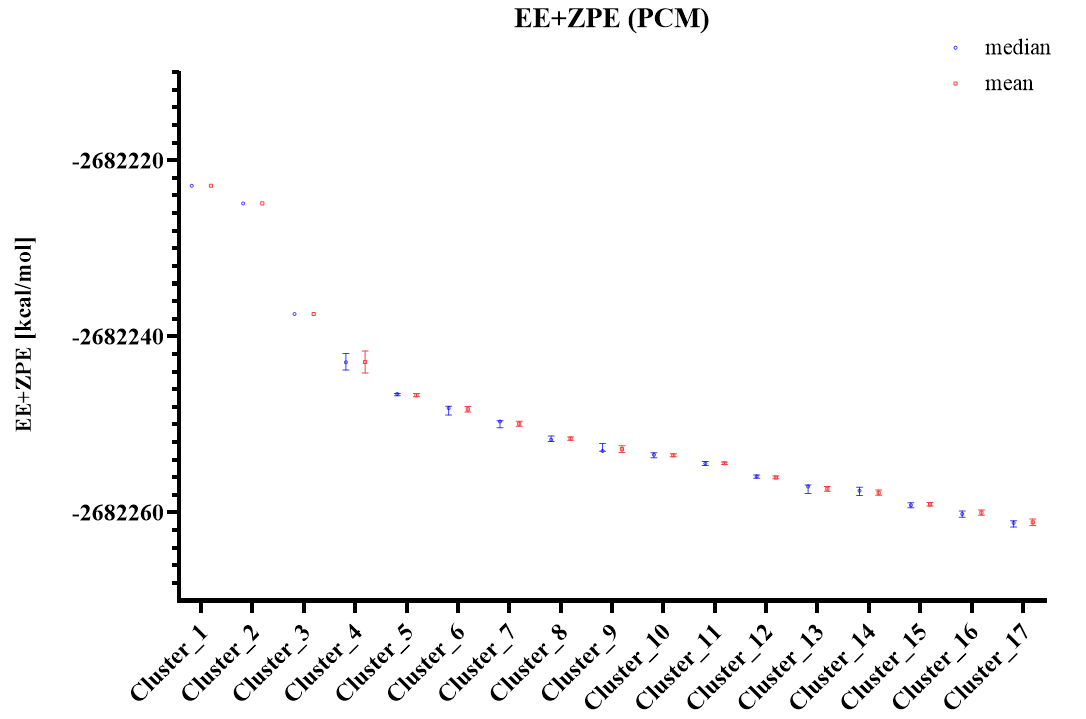


Figure S. Mean (red) and median (blue) of EE+ZPE values calculated using PCM approach for each cluster. The error bars represent 95% CI.

Table S. List of properties calculated for guests using QSAR models.

| Short name of properties | Long name of properties |
| --- | --- |
| Amine (Fragment Counts) |  |
| Carboxylate (Fragment Counts) |  |
| Carboxylic Acid (Fragment Counts) |  |
| Glycerol (Fragment Counts) |  |
| Glycol (Fragment Counts) |  |
| Hydroxy (Fragment Counts) |  |
| Methanal (Fragment Counts) |  |
| Methoxy (Fragment Counts) |  |
| Nitrile (Fragment Counts) |  |
| Nitro (Fragment Counts) |  |
| Phenoxy (Fragment Counts) |  |
| Quaternary amine (Fragment Counts) |  |
| Butyl (Fragment Counts) |  |
| Ethyl (Fragment Counts) |  |
| Ethylene (Fragment Counts) |  |
| Isobutyl (Fragment Counts) |  |
| Isopropyl (Fragment Counts) |  |
| Methyl (Fragment Counts) |  |
| Propyl (Fragment Counts) |  |
| Tertiary butyl (Fragment Counts) |  |
| Phenyl (Fragment Counts) |  |
| Cyclohexane (Fragment Counts) |  |
| Total charge (Atomistic Descriptors) | Total Atomic Charge |
| Total formal charge (Atomistic Descriptors) | Total Formal Charge |
| Total molecular mass (Atomistic Descriptors) | Total Molecular Mass |
| Atom count (Atomistic Descriptors) | Total Atom Count |
| Element count (Atomistic Descriptors) | Element Count |
| Rotatable bonds (Fast Descriptors) | Number of Rotatable Bonds |
| Hydrogen bond donor (Fast Descriptors) | Hydrogen Bond Donor Count |
| Hydrogen bond acceptor (Fast Descriptors) | Hydrogen Bond Acceptor Count |
| Chiral centers (Fast Descriptors) | Chiral Centers |
| AlogP (Fast Descriptors) | Calculated Partition Coefficient (AlogP) |
| AlogP98 (Fast Descriptors) | Revised Partition Coefficient (AlogP98) |
| Molecular refractivity (Fast Descriptors) | Molecular Refractivity |
| Molecular flexibility (Fast Descriptors) | Molecular Flexibility Index |
| Balaban index JX (Fast Descriptors) | Balaban JX Index |
| Balaban index JY (Fast Descriptors) | Balaban JY Index |
| Wiener index (Fast Descriptors) | Wiener Index |
| Zagreb index (Fast Descriptors) | Zagreb Index |
| Kappa-1 (Fast Descriptors) | Kappa Shape Index 1 |
| Kappa-2 (Fast Descriptors) | Kappa Shape Index 2 |
| Kappa-3 (Fast Descriptors) | Kappa Shape Index 3 |
| Kappa-1 (alpha modified) (Fast Descriptors) | Modified Kappa Shape Index 1 (Alpha Version) |
| Kappa-2 (alpha modified) (Fast Descriptors) | Modified Kappa Shape Index 2 (Alpha Version) |
| Kappa-3 (alpha modified) (Fast Descriptors) | Modified Kappa Shape Index 3 (Alpha Version) |
| Subgraph counts (0): path (Fast Descriptors) | Subgraph Path Count (Order 0) |
| Subgraph counts (1): path (Fast Descriptors) | Subgraph Path Count (Order 1) |
| Subgraph counts (2): path (Fast Descriptors) | Subgraph Path Count (Order 2) |
| Subgraph counts (3): path (Fast Descriptors) | Subgraph Path Count (Order 3) |
| Subgraph counts (3): cluster (Fast Descriptors) | Subgraph Cluster Count (Order 3) |
| Subgraph counts (3): chain (Fast Descriptors) | Subgraph Chain Count (Order 3) |
| Chi (0) (Fast Descriptors) | Connectivity Index (Order 0) |
| Chi (1) (Fast Descriptors) | Connectivity Index (Order 1) |
| Chi (2) (Fast Descriptors) | Connectivity Index (Order 2) |
| Chi (3): path (Fast Descriptors) | Connectivity Index (Order 3): Path |
| Chi (3): cluster (Fast Descriptors) | Connectivity Index (Order 3): Cluster |
| Chi (3): chain (Fast Descriptors) | Connectivity Index (Order 3): Chain |
| Chi (0) (valence modified) (Fast Descriptors) | Valence Modified Connectivity Index (Order 0) |
| Chi (1) (valence modified) (Fast Descriptors) | Valence Modified Connectivity Index (Order 1) |
| Chi (2) (valence modified) (Fast Descriptors) | Valence Modified Connectivity Index (Order 2) |
| Chi (3): path (valence modified) (Fast Descriptors) | Valence Modified Connectivity Index (Order 3): Path |
| Chi (3): cluster (valence modified) (Fast Descriptors) | Valence Modified Connectivity Index (Order 3): Cluster |
| Chi (3): chain (valence modified) (Fast Descriptors) | Valence Modified Connectivity Index (Order 3): Chain |
| Information content (IC) (Fast Descriptors) | Information Content Index |
| Bond information content (BIC) (Fast Descriptors) | Bond Information Content Index |
| Complementary information content (CIC) (Fast Descriptors) | Complementary Information Content Index |
| Structural information content (SIC) (Fast Descriptors) | Structural Information Content Index |
| Edge adjacency/magnitude (Fast Descriptors) | Edge Adjacency Magnitude |
| Edge distance/magnitude (Fast Descriptors) | Edge Distance Magnitude |
| Vertex adjacency/equality (Fast Descriptors) | Vertex Adjacency Equality |
| Vertex adjacency/magnitude (Fast Descriptors) | Vertex Adjacency Magnitude |
| Vertex distance/equality (Fast Descriptors) | Vertex Distance Equality |
| Vertex distance/magnitude (Fast Descriptors) | Vertex Distance Magnitude |
| Atomic composition (total) (Fast Descriptors) | Total Atomic Composition |
| E-state keys (sums): S_sCH3 (Fast Descriptors) | Electrotopological State (E-state) Key Sum for -CH3 Groups |
| E-state keys (sums): S_dCH2 (Fast Descriptors) | Electrotopological State (E-state) Key Sum for =CH2 Groups |
| E-state keys (sums): S_ssCH2 (Fast Descriptors) | Electrotopological State (E-state) Key Sum for -CH2- Groups |
| E-state keys (sums): S_tCH (Fast Descriptors) | Electrotopological State (E-state) Key Sum for -CH Groups |
| E-state keys (sums): S_dsCH (Fast Descriptors) | Electrotopological State (E-state) Key Sum for =CH Groups |
| E-state keys (sums): S_aaCH (Fast Descriptors) | Electrotopological State (E-state) Key Sum for Aromatic -CH Groups |
| E-state keys (sums): S_sssCH (Fast Descriptors) | Electrotopological State (E-state) Key Sum for Tertiary -CH Groups |
| E-state keys (sums): S_tsC(Fast Descriptors) | Electrotopological State (E-state) Key Sum for tertiary saturated carbon atoms |
| E-state keys (sums): S_dssC (Fast Descriptors) | Electrotopological State (E-state) Key Sum for =CH- Groups |
| E-state keys (sums): S_aasC (Fast Descriptors) | Electrotopological State (E-state) Key Sum for Aromatic Carbons |
| E-state keys (sums): S_aaaC (Fast Descriptors) | Electrotopological State (E-state) Key Sum for Aromatic Carbons with Substituents |
| E-state keys (sums): S_ssssC (Fast Descriptors) | Electrotopological State (E-state) Key Sum for Quaternary Carbons |
| E-state keys (sums): S_sNH3 (Fast Descriptors) | Electrotopological State (E-state) Key Sum for -NH3 Groups |
| E-state keys (sums): S_sNH2 (Fast Descriptors) | Electrotopological State (E-state) Key Sum for -NH2 Groups |
| E-state keys (sums): S_ssNH2 (Fast Descriptors) | Electrotopological State (E-state) Key Sum for -NH Groups |
| E-state keys (sums): S_ssNH (Fast Descriptors) | Electrotopological State (E-state) Key Sum for -NH Groups |
| E-state keys (sums): S_aaNH (Fast Descriptors) | Electrotopological State (E-state) Key Sum for Aromatic NH Groups |
| E-state keys (sums): S_tN (Fast Descriptors) | Electrotopological State (E-state) Key Sum for Triple Bonded Nitrogen |
| E-state keys (sums): S_sssNH (Fast Descriptors) | Electrotopological State (E-state) Key Sum for Tertiary NH Groups |
| E-state keys (sums): S_dsN (Fast Descriptors) | Electrotopological State (E-state) Key Sum for =N- Groups |
| E-state keys (sums): S_aaN (Fast Descriptors) | Electrotopological State (E-state) Key Sum for Aromatic Nitrogen Atoms |
| E-state keys (sums): S_sssN (Fast Descriptors) | Electrotopological State (E-state) Key Sum for Quaternary Nitrogen |
| E-state keys (sums): S_ddsN (Fast Descriptors) | Electrotopological State (E-state) Key Sum for =N= Groups |
| E-state keys (sums): S_aasN (Fast Descriptors) | Electrotopological State (E-state) Key Sum for Aromatic Substituted Nitrogen |
| E-state keys (sums): S_ssssN (Fast Descriptors) | Electrotopological State (E-state) Key Sum for Pentavalent Nitrogen |
| E-state keys (sums): S_sOH (Fast Descriptors) | Electrotopological State (E-state) Key Sum for -OH Groups |
| E-state keys (sums): S_dO (Fast Descriptors) | Electrotopological State (E-state) Key Sum for =O Groups |
| E-state keys (sums): S_ssO (Fast Descriptors) | Electrotopological State (E-state) Key Sum for Ether Oxygen (-O-) |
| E-state keys (sums): S_ssS (Fast Descriptors) | Electrotopological State (E-state) Key Sum for Thioether (-S-) |
| E-state keys (sums): S_aaS (Fast Descriptors) | Electrotopological State (E-state) Key Sum for Aromatic Sulfur |
| E-state keys (sums): S_dssS (Fast Descriptors) | Electrotopological State (E-state) Key Sum for Sulfoxide (-S=O) |
| E-state keys (sums): S_ddssS (Fast Descriptors) | Electrotopological State (E-state) Key Sum for Sulfones (-S(=O)2-) |
| E-state keys (sums): S_dsssP (Fast Descriptors) | Electrotopological State (E-state) Key Sum for Phosphorus with Double Bond |
| E-state keys (sums): S_sF (Fast Descriptors) | Electrotopological State (E-state) Key Sum for Fluorine |
| E-state keys (sums): S_sCl (Fast Descriptors) | Electrotopological State (E-state) Key Sum for Chlorine |
| E-state keys (sums): S_sBr (Fast Descriptors) | Electrotopological State (E-state) Key Sum for Bromine |
| E-state keys (sums): S_dssSe (Fast Descriptors) | Electrotopological State (E-state) Key Sum for Selenium with Double Bond |
| Molecular area (vdW area) (Spatial Descriptors) | Molecular Area (Van der Waals Area) |
| Molecular volume (vdW volume) (Spatial Descriptors) | Molecular Volume (Van der Waals Volume) |
| Molecular density (Spatial Descriptors) | Molecular Density |
| Principal moments of inertia (magnitude) (Spatial Descriptors) | Principal Moments of Inertia (Magnitude) |
| Principal moment of inertia X (Spatial Descriptors) | Principal Moment of Inertia: X Axis |
| Principal moment of inertia Y (Spatial Descriptors) | Principal Moment of Inertia: Y Axis |
| Principal moment of inertia Z (Spatial Descriptors) | Principal Moment of Inertia: Z Axis |
| Radius of gyration (Spatial Descriptors) | Radius of Gyration |
| Ellipsoidal volume (Spatial Descriptors) | Ellipsoidal Volume |
| Shadow area: XY plane (Spatial Descriptors) | Shadow Area on XY Plane |
| Shadow area: YZ plane (Spatial Descriptors) | Shadow Area on YZ Plane |
| Shadow area: ZX plane (Spatial Descriptors) | Shadow Area on ZX Plane |
| Shadow area fraction: XY plane (Spatial Descriptors) | Shadow Area Fraction on XY Plane |
| Shadow area fraction: YZ plane (Spatial Descriptors) | Shadow Area Fraction on YZ Plane |
| Shadow area fraction: ZX plane (Spatial Descriptors) | Shadow Area Fraction on ZX Plane |
| Shadow length: LX (Spatial Descriptors) | Shadow Length in X Direction |
| Shadow length: LY (Spatial Descriptors) | Shadow Length in Y Direction |
| Shadow length: LZ (Spatial Descriptors) | Shadow Length in Z Direction |
| Shadow ratio (Spatial Descriptors) | Shadow Length Ratio |
| Dipole moment (magnitude) (Spatial Descriptors) | Dipole Moment (Magnitude) |
| Dipole moment X (Spatial Descriptors) | Dipole Moment in X Direction |
| Dipole moment Y (Spatial Descriptors) | Dipole Moment in Y Direction |
| Dipole moment Z (Spatial Descriptors) | Dipole Moment in Z Direction |
| Connolly surface area (Atom Volumes and Surfaces) | Connolly Surface Area |
| Connolly surface occupied volume (Atom Volumes and Surfaces) | Connolly Surface Occupied Volume |
| Solvent surface area (Atom Volumes and Surfaces) | Solvent Surface Area |
| Solvent surface occupied volume (Atom Volumes and Surfaces) | Solvent Surface Occupied Volume |
| SASA (Jurs Descriptors) | Solvent Accessible Surface Area |
| PPSA1 (Jurs Descriptors) | Polar Surface Area 1 |
| PNSA1 (Jurs Descriptors) | Non-Polar Surface Area 1 |
| DPSA1 (Jurs Descriptors) | Dipole Surface Area 1 |
| PPSA2 (Jurs Descriptors) | Polar Surface Area 2 |
| PNSA2 (Jurs Descriptors) | Non-Polar Surface Area 2 |
| DPSA2 (Jurs Descriptors) | Dipole Surface Area 2 |
| PPSA3 (Jurs Descriptors) | Polar Surface Area 3 |
| PNSA3 (Jurs Descriptors) | Non-Polar Surface Area 3 |
| DPSA3 (Jurs Descriptors) | Dipole Surface Area 3 |
| FPSA1 (Jurs Descriptors) | Flexible Surface Area 1 |
| FPSA2 (Jurs Descriptors) | Flexible Surface Area 2 |
| FPSA3 (Jurs Descriptors) | Flexible Surface Area 3 |
| FNSA1 (Jurs Descriptors) | Flexible Non-Polar Surface Area 1 |
| FNSA2 (Jurs Descriptors) | Flexible Non-Polar Surface Area 2 |
| FNSA3 (Jurs Descriptors) | Flexible Non-Polar Surface Area 3 |
| WPSA1 (Jurs Descriptors) | Weighted Polar Surface Area 1 |
| WPSA2 (Jurs Descriptors) | Weighted Polar Surface Area 2 |
| WPSA3 (Jurs Descriptors) | Weighted Polar Surface Area 3 |
| WNSA1 (Jurs Descriptors) | Weighted Non-Polar Surface Area 1 |
| WNSA2 (Jurs Descriptors) | Weighted Non-Polar Surface Area 2 |
| WNSA3 (Jurs Descriptors) | Weighted Non-Polar Surface Area 3 |
| RPCG (Jurs Descriptors) | Rigid Polar Contact Group |
| RNCG (Jurs Descriptors) | Rigid Non-Polar Contact Group |
| RPCS (Jurs Descriptors) | Rigid Polar Contact Surface |
| RNCS (Jurs Descriptors) | Rigid Non-Polar Contact Surface |
| TPSA (Jurs Descriptors) | Topological Polar Surface Area |
| TASA (Jurs Descriptors) | Topological Accessible Surface Area |
| RPSA (Jurs Descriptors) | Reduced Polar Surface Area |
| RASA (Jurs Descriptors) | Reduced Accessible Surface Area |

Table S. Details results of significant Spearman correlations between properties of the guests and the G value of β-CD calculated using PCM solvation model.

| Properties | Reference | Spearman r | 95% confidence interval | P (two-tailed) | P value summary | Exact or approximate P value? | Number of XY Pairs |
| --- | --- | --- | --- | --- | --- | --- | --- |
| Methoxy (Fragment Counts) | G value [kcal/mol] PCM | -0.2185 | -0.3165 to -0.1160 | <0.0001 | **** | Approximate | 368 |
| Nitro (Fragment Counts) | G value [kcal/mol] PCM | 0.1327 | 0.02783 to 0.2346 | 0.0108 | * | Approximate | 368 |
| Phenyl (Fragment Counts) | G value [kcal/mol] PCM | -0.1055 | -0.2084 to -0.0002545 | 0.0431 | * | Approximate | 368 |
| Element count (Atomistic Descriptors) | G value [kcal/mol] PCM | 0.1235 | 0.01848 to 0.2258 | 0.0178 | * | Approximate | 368 |
| Molecular refractivity (Fast Descriptors) | G value [kcal/mol] PCM | 0.109 | 0.003829 to 0.2118 | 0.0366 | * | Approximate | 368 |
| Wiener index (Fast Descriptors) | G value [kcal/mol] PCM | 0.1114 | 0.006218 to 0.2141 | 0.0327 | * | Approximate | 368 |
| Zagreb index (Fast Descriptors) | G value [kcal/mol] PCM | 0.1303 | 0.02541 to 0.2323 | 0.0124 | * | Approximate | 368 |
| Subgraph counts (0): path (Fast Descriptors) | G value [kcal/mol] PCM | 0.113 | 0.007883 to 0.2157 | 0.0302 | * | Approximate | 368 |
| Subgraph counts (1): path (Fast Descriptors) | G value [kcal/mol] PCM | 0.1328 | 0.02799 to 0.2348 | 0.0107 | * | Approximate | 368 |
| Subgraph counts (2): path (Fast Descriptors) | G value [kcal/mol] PCM | 0.1367 | 0.03195 to 0.2385 | 0.0086 | ** | Approximate | 368 |
| Subgraph counts (3): path (Fast Descriptors) | G value [kcal/mol] PCM | 0.1618 | 0.05752 to 0.2625 | 0.0018 | ** | Approximate | 368 |
| Subgraph counts (3): cluster (Fast Descriptors) | G value [kcal/mol] PCM | 0.1055 | 0.0002829 to 0.2084 | 0.0431 | * | Approximate | 368 |
| Chi (1) (Fast Descriptors) | G value [kcal/mol] PCM | 0.115 | 0.009881 to 0.2176 | 0.0274 | * | Approximate | 368 |
| Chi (2) (Fast Descriptors) | G value [kcal/mol] PCM | 0.1126 | 0.007487 to 0.2153 | 0.0308 | * | Approximate | 368 |
| Chi (3): path (Fast Descriptors) | G value [kcal/mol] PCM | 0.1572 | 0.05281 to 0.2581 | 0.0025 | ** | Approximate | 368 |
| Chi (1) (valence modified) (Fast Descriptors) | G value [kcal/mol] PCM | 0.1285 | 0.02354 to 0.2306 | 0.0137 | * | Approximate | 368 |
| Chi (3): path (valence modified) (Fast Descriptors) | G value [kcal/mol] PCM | 0.1778 | 0.07397 to 0.2778 | 0.0006 | *** | Approximate | 368 |
| Edge adjacency/magnitude (Fast Descriptors) | G value [kcal/mol] PCM | 0.1367 | 0.03195 to 0.2385 | 0.0086 | ** | Approximate | 368 |
| Edge distance/magnitude (Fast Descriptors) | G value [kcal/mol] PCM | 0.1319 | 0.02705 to 0.2339 | 0.0113 | * | Approximate | 368 |
| Vertex adjacency/equality (Fast Descriptors) | G value [kcal/mol] PCM | 0.1227 | 0.01765 to 0.2250 | 0.0186 | * | Approximate | 368 |
| Vertex adjacency/magnitude (Fast Descriptors) | G value [kcal/mol] PCM | 0.1328 | 0.02799 to 0.2348 | 0.0107 | * | Approximate | 368 |
| Vertex distance/equality (Fast Descriptors) | G value [kcal/mol] PCM | 0.1133 | 0.008201 to 0.2160 | 0.0297 | * | Approximate | 368 |
| Vertex distance/magnitude (Fast Descriptors) | G value [kcal/mol] PCM | 0.1121 | 0.006971 to 0.2148 | 0.0315 | * | Approximate | 368 |
| E-state keys (sums): S_dssC (Fast Descriptors) | G value [kcal/mol] PCM | 0.1127 | 0.007552 to 0.2154 | 0.0307 | * | Approximate | 368 |
| E-state keys (sums): S_ssNH (Fast Descriptors) | G value [kcal/mol] PCM | -0.1221 | -0.2245 to -0.01710 | 0.0191 | * | Approximate | 368 |
| E-state keys (sums): S_ddsN (Fast Descriptors) | G value [kcal/mol] PCM | -0.1329 | -0.2349 to -0.02807 | 0.0107 | * | Approximate | 368 |
| E-state keys (sums): S_dssS (Fast Descriptors) | G value [kcal/mol] PCM | 0.1346 | 0.02980 to 0.2365 | 0.0097 | ** | Approximate | 368 |
| E-state keys (sums): S_sBr (Fast Descriptors) | G value [kcal/mol] PCM | -0.1212 | -0.2235 to -0.01614 | 0.0201 | * | Approximate | 368 |
| SASA (Jurs Descriptors) | G value [kcal/mol] PCM | 0.4781 | 0.2309 to 0.6673 | 0.0003 | *** | Approximate | 53 |
| PNSA1 (Jurs Descriptors) | G value [kcal/mol] PCM | 0.4826 | 0.2364 to 0.6706 | 0.0003 | *** | Approximate | 53 |
| DPSA1 (Jurs Descriptors) | G value [kcal/mol] PCM | -0.4653 | -0.6581 to -0.2153 | 0.0004 | *** | Approximate | 53 |
| FNSA3 (Jurs Descriptors) | G value [kcal/mol] PCM | 0.4216 | 0.1628 to 0.6261 | 0.0017 | ** | Approximate | 53 |
| WNSA1 (Jurs Descriptors) | G value [kcal/mol] PCM | 0.4826 | 0.2364 to 0.6706 | 0.0003 | *** | Approximate | 53 |
| RNCG (Jurs Descriptors) | G value [kcal/mol] PCM | -0.4193 | -0.6244 to -0.1600 | 0.0018 | ** | Approximate | 53 |
| RNCS (Jurs Descriptors) | G value [kcal/mol] PCM | -0.5338 | -0.7068 to -0.3005 | <0.0001 | **** | Approximate | 53 |

Table S. Details results of significant Spearman correlations between properties of the guests and the G value of β-CD calculated in vacuo.

| Properties | Reference | Spearman r | 95% confidence interval | P (two-tailed) | P value summary | Exact or approximate P value? | Number of XY Pairs |
| --- | --- | --- | --- | --- | --- | --- | --- |
| Methanal (Fragment Counts) | G value [kcal/mol] in vacuo | 0.1268 | 0.02187 to 0.2290 | 0.0149 | * | Approximate | 368 |
| Methoxy (Fragment Counts) | G value [kcal/mol] in vacuo | -0.1474 | -0.2487 to -0.04279 | 0.0046 | ** | Approximate | 368 |
| Butyl (Fragment Counts) | G value [kcal/mol] in vacuo | 0.1141 | 0.008987 to 0.2167 | 0.0286 | * | Approximate | 368 |
| Propyl (Fragment Counts) | G value [kcal/mol] in vacuo | 0.1135 | 0.008325 to 0.2161 | 0.0295 | * | Approximate | 368 |
| AlogP98 (Fast Descriptors) | G value [kcal/mol] in vacuo | 0.1261 | 0.02115 to 0.2283 | 0.0155 | * | Approximate | 368 |
| Chi (3): path (valence modified) (Fast Descriptors) | G value [kcal/mol] in vacuo | 0.1075 | 0.002332 to 0.2104 | 0.0392 | * | Approximate | 368 |
| E-state keys (sums): S_sssCH (Fast Descriptors) | G value [kcal/mol] in vacuo | 0.1249 | 0.01993 to 0.2271 | 0.0165 | * | Approximate | 368 |
| E-state keys (sums): S_ssNH (Fast Descriptors) | G value [kcal/mol] in vacuo | -0.1469 | -0.2483 to -0.04234 | 0.0047 | ** | Approximate | 368 |
| PPSA1 (Jurs Descriptors) | G value [kcal/mol] in vacuo | 0.3497 | 0.07954 to 0.5720 | 0.0103 | * | Approximate | 53 |
| PPSA2 (Jurs Descriptors) | G value [kcal/mol] in vacuo | 0.3497 | 0.07954 to 0.5720 | 0.0103 | * | Approximate | 53 |
| PPSA3 (Jurs Descriptors) | G value [kcal/mol] in vacuo | 0.3497 | 0.07954 to 0.5720 | 0.0103 | * | Approximate | 53 |
| FPSA1 (Jurs Descriptors) | G value [kcal/mol] in vacuo | 0.3535 | 0.08387 to 0.5749 | 0.0094 | ** | Approximate | 53 |
| FPSA3 (Jurs Descriptors) | G value [kcal/mol] in vacuo | 0.3535 | 0.08387 to 0.5749 | 0.0094 | ** | Approximate | 53 |
| FNSA1 (Jurs Descriptors) | G value [kcal/mol] in vacuo | -0.3535 | -0.5749 to -0.08387 | 0.0094 | ** | Approximate | 53 |
| WPSA1 (Jurs Descriptors) | G value [kcal/mol] in vacuo | 0.3327 | 0.06043 to 0.5589 | 0.0149 | * | Approximate | 53 |
| WPSA2 (Jurs Descriptors) | G value [kcal/mol] in vacuo | 0.3327 | 0.06043 to 0.5589 | 0.0149 | * | Approximate | 53 |
| WPSA3 (Jurs Descriptors) | G value [kcal/mol] in vacuo | 0.3327 | 0.06043 to 0.5589 | 0.0149 | * | Approximate | 53 |
| RPCS (Jurs Descriptors) | G value [kcal/mol] in vacuo | 0.3497 | 0.07954 to 0.5720 | 0.0103 | * | Approximate | 53 |

Table S. List of QSAR models used for the investigation of guest properties.

| **Types of properties** | **Category** | **Model** |
| --- | --- | --- |
| Functional group count | Feature counts | Fragment Counts |
| Hydrocarbon count | Feature counts | Fragment Counts |
| Ring count | Feature counts | Fragment Counts |
| Total charge | Charges | Atomistic Descriptors |
| Total formal charge | Charges | Atomistic Descriptors |
| Total molecular mass | Structural | Atomistic Descriptors |
| Atom count | Feature counts | Atomistic Descriptors |
| Element count | Feature counts | Atomistic Descriptors |
| Marked structure | Structural | Mark Structures |
| Rotatable bonds | Structural | Fast Descriptors |
| Hydrogen bond donor | Structural | Fast Descriptors |
| Hydrogen bond acceptor | Structural | Fast Descriptors |
| Chiral centers | Structural | Fast Descriptors |
| AlogP | Thermodynamic | Fast Descriptors |
| AlogP98 | Thermodynamic | Fast Descriptors |
| Molecular refractivity | Thermodynamic | Fast Descriptors |
| Molecular flexibility | Topological | Fast Descriptors |
| Balaban indices | Topological | Fast Descriptors |
| Wiener index | Topological | Fast Descriptors |
| Zagreb index | Topological | Fast Descriptors |
| Kappa indices | Topological | Fast Descriptors |
| Subgraph counts | Topological | Fast Descriptors |
| Chi indices | Topological | Fast Descriptors |
| Valence modified chi indices | Topological | Fast Descriptors |
| Information content | Information | Fast Descriptors |
| E-state keys | E-state keys | Fast Descriptors |
| Molecular area (vdW area) | Structural | Spatial Descriptors |
| Molecular volume (vdW volume) | Structural | Spatial Descriptors |
| Molecular density | Structural | Spatial Descriptors |
| Moments of inertia | Spatial | Spatial Descriptors |
| Radius of gyration | Spatial | Spatial Descriptors |
| Ellipsoidal volume | Spatial | Spatial Descriptors |
| Molecular shadow indices | Spatial | Spatial Descriptors |
| Molecular dipole moment | Multipoles | Spatial Descriptors |
| Connolly Surface | Spatial | Atom Volumes and Surfaces |
| Surface Area | Spatial | Atom Volumes and Surfaces |
| Occupied Volume | Spatial | Atom Volumes and Surfaces |
| Solvent accessible area | Spatial | Jurs Descriptors |
| Partial charged areas | Spatial | Jurs Descriptors |
| Total charge weighted areas | Spatial | Jurs Descriptors |
| Atomic charge weighted areas | Spatial | Jurs Descriptors |
| Fractional charged partial areas | Spatial | Jurs Descriptors |
| Surface weighted partial areas | Spatial | Jurs Descriptors |
| Relative charges | Spatial | Jurs Descriptors |
| Polar and apolar areas | Spatial | Jurs Descriptors |

**Table S12.** Results of statistically significant Spearman correlation tested between G values calculated in vacuo and G values calculated using PCM models. The non-statistically significant correlations were not presented.

| Category | Molecular property | Spearman r (correlation of property vs. G value calculated in vacuo) | Spearman r (correlation of property vs. G value calculated using PCM model) | Number of tested guests |
| --- | --- | --- | --- | --- |
| Atomistic Descriptors | Element count |  | 0.1235 | 368 |
| Fast Descriptors | AlogP98 | 0.1261 |  | 368 |
| Chi (1) |  | 0.1150 |
| Chi (1) (valence modified) |  | 0.1285 |
| Chi (2) |  | 0.1126 |
| Chi (3): path |  | 0.1572 |
| Chi (3): path (valence modified) | 0.1075 | 0.1778 |
| Edge adjacency/magnitude |  | 0.1367 |
| Edge distance/magnitude |  | 0.1319 |
| E-state keys (sums): S_ddsN |  | -0.1329 |
| E-state keys (sums): S_dssC |  | 0.1127 |
| E-state keys (sums): S_dssS |  | 0.1346 |
| E-state keys (sums): S_sBr |  | -0.1212 |
| E-state keys (sums): S_ssNH | -0.1469 | -0.1221 |
| E-state keys (sums): S_sssCH | 0.1249 |  |
| Molecular refractivity |  | 0.1090 |
| Subgraph counts (0): path |  | 0.1130 |
| Subgraph counts (1): path |  | 0.1328 |
| Subgraph counts (2): path |  | 0.1367 |
| Subgraph counts (3): cluster |  | 0.1055 |
| Subgraph counts (3): path |  | 0.1618 |
| Vertex adjacency/equality |  | 0.1227 |
| Vertex adjacency/magnitude |  | 0.1328 |
| Vertex distance/equality |  | 0.1133 |
| Vertex distance/magnitude |  | 0.1121 |
| Wiener index |  | 0.1114 |
| Zagreb index |  | 0.1303 |
| Fragment Counts | Butyl | 0.1141 |  | 368 |
| Methanal | 0.1268 |  |
| Methoxy | -0.1474 | -0.2185 |
| Nitro |  | 0.1327 |
| Phenyl |  | -0.1055 |
| Propyl | 0.1135 |  |
| Jurs Descriptors | DPSA1 |  | -0.4653 | 53 |
| FNSA1 | -0.3535 |  |
| FNSA3 |  | 0.4216 |
| FPSA1 | 0.3535 |  |
| FPSA2 | 0.3535 |  |
| FPSA3 | 0.3535 |  |
| PNSA1 |  | 0.4826 |
| PPSA1 | 0.3497 |  |
| PPSA2 | 0.3497 |  |
| PPSA3 | 0.3497 |  |
| RNCG |  | -0.4193 |
| RNCS |  | -0.5338 |
| RPCS | 0.3497 |  |
| SASA |  | 0.4781 |
| WNSA1 |  | 0.4826 |
| WPSA1 | 0.3327 |  |
| WPSA2 | 0.3327 |  |
| WPSA3 | 0.3327 |  |
